# Supplementary material
Source: MDPI journal article supplement (https://www.mdpi.com/2304-6740/5/4/78)

# checkCIF/PLATON report

Structure factors have been supplied for datablock(s) li274

THIS REPORT IS FOR GUIDANCE ONLY. IF USED AS PART OF A REVIEW PROCEDURE FOR PUBLICATION, IT SHOULD NOT REPLACE THE EXPERTISE OF AN EXPERIENCED CRYSTALLOGRAPHIC REFEREE.

No syntax errors found.      CIF dictionary      Interpreting this report

## Datablock: li274

---

Bond precision:    C-C = 0.0157 Å                      Wavelength=0.71073

Cell:                      a=20.5260(16)              b=10.3670(6)              c=17.0858(10)  
                                alpha=90                      beta=90                      gamma=90

Temperature:            170 K

|                | Calculated      | Reported        |
|----------------|-----------------|-----------------|
| Volume         | 3635.7(4)       | 3635.7(4)       |
| Space group    | P n a 21        | P n a 21        |
| Hall group     | P 2c -2n        | P 2c -2n        |
| Moiety formula | C41 H39 I Ni P3 | C41 H39 I Ni P3 |
| Sum formula    | C41 H39 I Ni P3 | C41 H39 I Ni P3 |
| Mr             | 810.22          | 810.24          |
| Dx,g cm-3      | 1.480           | 1.480           |
| Z              | 4               | 4               |
| Mu (mm-1)      | 1.543           | 1.543           |
| F000           | 1644.0          | 1644.0          |
| F000'          | 1645.09         |                 |
| h,k,lmax       | 34,17,28        | 30,16,28        |
| Nref           | 18027[ 9249]    | 14073           |
| Tmin,Tmax      |                 | 0.774,1.000     |
| Tmin'          |                 |                 |

Correction method= # Reported T Limits: Tmin=0.774 Tmax=1.000  
AbsCorr = MULTI-SCAN

Data completeness= 1.52/0.78                      Theta(max)= 36.624

R(reflections)= 0.0787( 6136)                      wR2(reflections)= 0.2167( 14073)

S = 0.941                                      Npar= 417

---

The following ALERTS were generated. Each ALERT has the format

**test-name\_ALERT\_alert-type\_alert-level.**

Click on the hyperlinks for more details of the test.

---

### Alert level B

RINTA01\_ALERT\_3\_B The value of Rint is greater than 0.18  
Rint given 0.181  
PLAT020\_ALERT\_3\_B The value of Rint is greater than 0.12 ..... 0.181 Report  
PLAT973\_ALERT\_2\_B Check Calcd Positive Residual Density on Ni05 1.87 eA-3

---

### Alert level C

PLAT026\_ALERT\_3\_C Ratio Observed / Unique Reflections (too) Low .. 44 %  
PLAT053\_ALERT\_1\_C Minimum Crystal Dimension Missing (or Error) ... Please Check  
PLAT054\_ALERT\_1\_C Medium Crystal Dimension Missing (or Error) ... Please Check  
PLAT055\_ALERT\_1\_C Maximum Crystal Dimension Missing (or Error) ... Please Check  
PLAT342\_ALERT\_3\_C Low Bond Precision on C-C Bonds ..... 0.01575 Ang.  
PLAT906\_ALERT\_3\_C Large K value in the Analysis of Variance ..... 10.563 Check  
PLAT906\_ALERT\_3\_C Large K value in the Analysis of Variance ..... 3.490 Check  
PLAT906\_ALERT\_3\_C Large K value in the Analysis of Variance ..... 3.789 Check  
PLAT906\_ALERT\_3\_C Large K value in the Analysis of Variance ..... 2.082 Check  
PLAT906\_ALERT\_3\_C Large K value in the Analysis of Variance ..... 2.045 Check  
PLAT910\_ALERT\_3\_C Missing # of FCF Reflection(s) Below Theta(Min). 7 Note  
PLAT915\_ALERT\_3\_C No Flack x Check Done: Low Friedel Pair Coverage 72 %  
PLAT978\_ALERT\_2\_C Number C-C Bonds with Positive Residual Density. 0 Info

---

### Alert level G

PLAT012\_ALERT\_1\_G No \_shelx\_res\_checksum found in CIF ..... Please Check  
PLAT232\_ALERT\_2\_G Hirshfeld Test Diff (M-X) I001 -- Ni05 .. 16.7 s.u.  
PLAT720\_ALERT\_4\_G Number of Unusual/Non-Standard Labels ..... 85 Note  
PLAT802\_ALERT\_4\_G CIF Input Record(s) with more than 80 Characters 1 Info  
PLAT912\_ALERT\_4\_G Missing # of FCF Reflections Above STh/L= 0.600 1301 Note  
PLAT933\_ALERT\_2\_G Number of OMIT Records in Embedded .res File ... 4 Note  
PLAT950\_ALERT\_5\_G Calculated (ThMax) and CIF-Reported Hmax Differ 4 Units  
PLAT956\_ALERT\_1\_G Calculated (ThMax) and Actual (FCF) Hmax Differ 4 Units

---

- 0 **ALERT level A** = Most likely a serious problem - resolve or explain  
3 **ALERT level B** = A potentially serious problem, consider carefully  
13 **ALERT level C** = Check. Ensure it is not caused by an omission or oversight  
8 **ALERT level G** = General information/check it is not something unexpected
- 5 ALERT type 1 CIF construction/syntax error, inconsistent or missing data  
4 ALERT type 2 Indicator that the structure model may be wrong or deficient  
11 ALERT type 3 Indicator that the structure quality may be low  
3 ALERT type 4 Improvement, methodology, query or suggestion  
1 ALERT type 5 Informative message, check
-

It is advisable to attempt to resolve as many as possible of the alerts in all categories. Often the minor alerts point to easily fixed oversights, errors and omissions in your CIF or refinement strategy, so attention to these fine details can be worthwhile. In order to resolve some of the more serious problems it may be necessary to carry out additional measurements or structure refinements. However, the purpose of your study may justify the reported deviations and the more serious of these should normally be commented upon in the discussion or experimental section of a paper or in the "special\_details" fields of the CIF. checkCIF was carefully designed to identify outliers and unusual parameters, but every test has its limitations and alerts that are not important in a particular case may appear. Conversely, the absence of alerts does not guarantee there are no aspects of the results needing attention. It is up to the individual to critically assess their own results and, if necessary, seek expert advice.

### **Publication of your CIF in IUCr journals**

A basic structural check has been run on your CIF. These basic checks will be run on all CIFs submitted for publication in IUCr journals (*Acta Crystallographica*, *Journal of Applied Crystallography*, *Journal of Synchrotron Radiation*); however, if you intend to submit to *Acta Crystallographica Section C* or *E* or *IUCrData*, you should make sure that full publication checks are run on the final version of your CIF prior to submission.

### **Publication of your CIF in other journals**

Please refer to the *Notes for Authors* of the relevant journal for any special instructions relating to CIF submission.

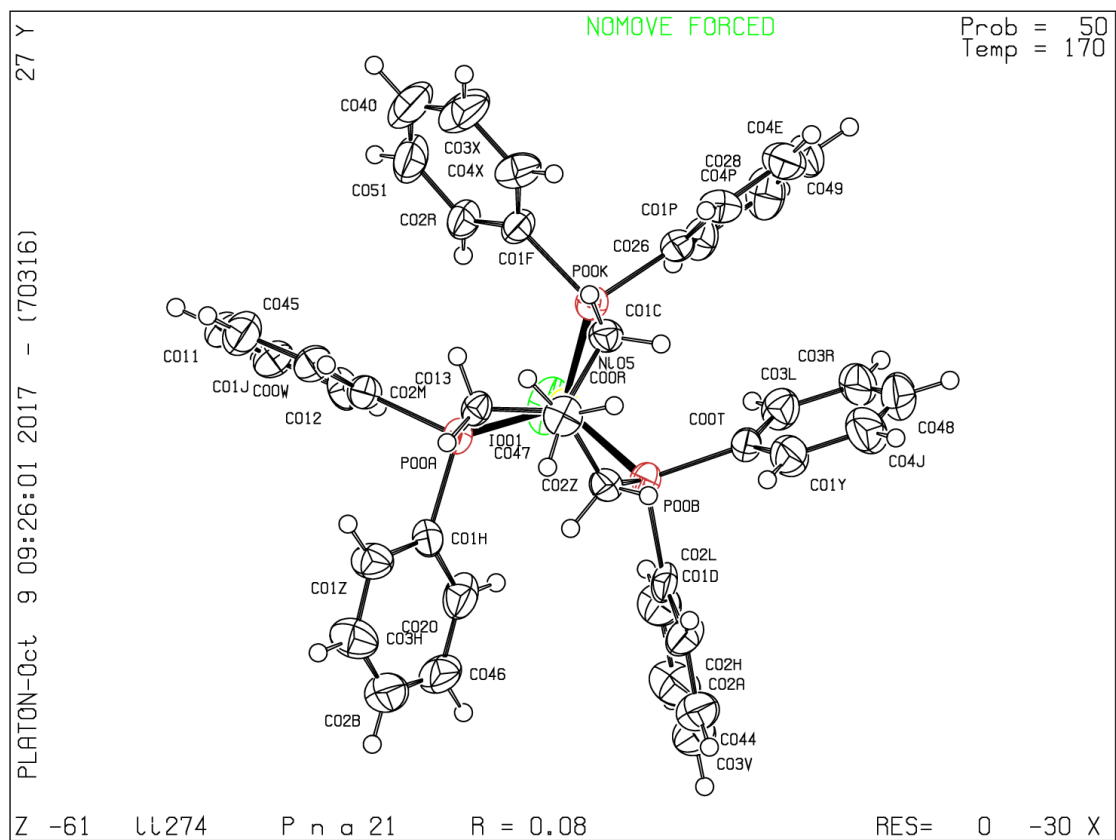

Supplement: s1 [file s1]
