# Supplementary material
Source: MDPI journal article supplement (https://www.mdpi.com/2304-6740/5/4/78)
Supplement: s1 [file s1]

## Supporting Information

### **Mechanistic Implications For The Ni-Catalyzed Kumada Cross-Coupling Reaction**

Linda Iffland<sup>1</sup>, Anette Petuker<sup>1</sup>, Maurice van Gastel<sup>2,\*</sup> and Ulf-Peter Apfel<sup>1,\*</sup>

<sup>1</sup> Ruhr-Universität Bochum, Inorganic Chemistry I, Universitätsstraße 50, 44801 Bochum

<sup>2</sup> Max-Planck-Institut für chemische Energiekonversion, Stiftstraße 34-36, 45470 Mülheim a. d. Ruhr

**X-ray Data Collection and Structure Solution Refinement.** Single crystals suitable for X-ray structure analysis were coated with Paratone N oil, mounted on a fiber loop, and placed in a cold, gaseous dinitrogen stream on the diffractometer. For all measurements Oxford XCalibur diffractometer performing  $\phi$  and  $\omega$  scans at 170(2) K were used. Diffraction intensities were measured using graphite-monochromatic Mo K $\alpha$  radiation ( $\lambda = 0.71073$  Å). Data collection, indexing, initial cell refinements, frame integration, final cell refinements, and absorption corrections were accomplished with the program CrysAlisPro,<sup>[1]</sup> Space groups were assigned by analysis of the metric symmetry and systematic absences (determined by WinGX<sup>[2]</sup>) and were further checked by PLATON<sup>[3,4]</sup> for additional symmetry. Structures were solved by direct methods and refined against all data in the reported  $2\theta$  ranges by full-matrix least squares on F<sup>2</sup> with the SHELXL program suite<sup>[5]</sup> using the OLEX2 or shelXle interface.<sup>[6,7]</sup> Crystallographic data as well as refinement parameters are presented in Table S2.

**Table S1.** Cell Parameters of complex **1** and of crystals obtained from the stoichiometric reactions solutions of **1** with 1 equiv. phenylmagnesium bromide, and of **2**, **3** or **4** with both 1 equiv. phenylmagnesium bromide and 1 equiv. 4-iodotoluene.

| Cell Parameters (Å and °)                          |                 |               |
|----------------------------------------------------|-----------------|---------------|
| Complex <b>1</b>                                   | a = 20.70(2)    | $\alpha = 90$ |
|                                                    | b = 10.259(11)  | $\beta = 90$  |
|                                                    | c = 16.853(16)  | $\gamma = 90$ |
| Complex <b>1</b> + phenyl Grignard                 | a = 20.59(5)    | $\alpha = 90$ |
|                                                    | b = 10.283(9)   | $\beta = 90$  |
|                                                    | c = 16.73(4)    | $\gamma = 90$ |
| Complex <b>2</b> + phenyl Grignard + 4-iodotoluene | a = 20.620(13)  | $\alpha = 90$ |
|                                                    | b = 10.185(7)   | $\beta = 90$  |
|                                                    | c = 16.932(13)  | $\gamma = 90$ |
| Complex <b>3</b> + phenyl Grignard + 4-iodotoluene | a = 20.571(17)  | $\alpha = 90$ |
|                                                    | b = 10.163(10)  | $\beta = 90$  |
|                                                    | c = 17.085(17)  | $\gamma = 90$ |
| Complex <b>4</b> + phenyl Grignard + 4-iodotoluene | a = 20.509(15)  | $\alpha = 90$ |
|                                                    | b = 10.31(6)    | $\beta = 90$  |
|                                                    | c = 16.922(13)  | $\gamma = 90$ |
|                                                    | a = 20.5259(16) | $\alpha = 90$ |
|                                                    | b = 17.0858(10) | $\beta = 90$  |
|                                                    | c = 20.7340(12) | $\gamma = 90$ |

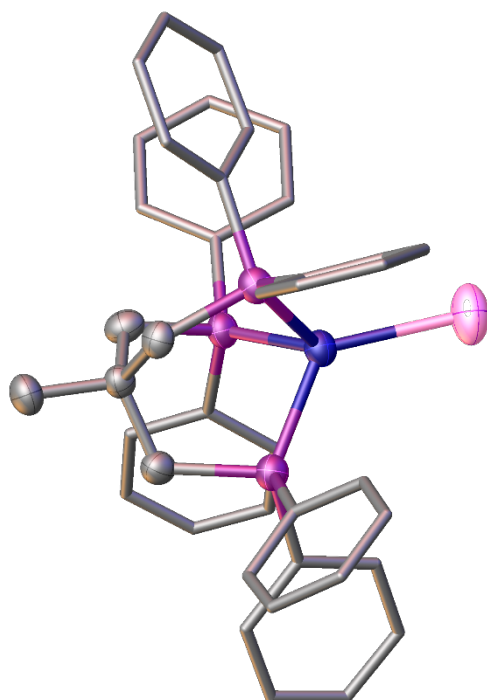

**Figure S1.** Structure of the asymmetric unit of compound 1. Probability level at 50%. Hydrogens and Carbons of the phenyl rings are omitted for clarity. Grey: Carbon; Purple: Phosphorus; Blue: Nickel; Pink: Iodine

**Table S2.** Crystal Data and Structure Refinement of [(Triphos)Ni<sup>I</sup>I].

| Property                                    | Value                                                          |
|---------------------------------------------|----------------------------------------------------------------|
| Identification code                         | LI274                                                          |
| Empirical formula                           | C <sub>41</sub> H <sub>39</sub> INiP <sub>3</sub>              |
| Formula weight                              | 810.24                                                         |
| Temperature/K                               | 170                                                            |
| Crystal system                              | orthorhombic                                                   |
| Space group                                 | Pna2 <sub>1</sub>                                              |
| a/Å                                         | 20.5260(16)                                                    |
| b/Å                                         | 10.3670(6)                                                     |
| c/Å                                         | 17.0858(10)                                                    |
| α/°                                         | 90                                                             |
| β/°                                         | 90                                                             |
| γ/°                                         | 90                                                             |
| Volume/Å <sup>3</sup>                       | 3635.7(4)                                                      |
| Z                                           | 4                                                              |
| ρ <sub>calc</sub> /g/cm <sup>3</sup>        | 1.480                                                          |
| μ/mm <sup>-1</sup>                          | 1.543                                                          |
| F(000)                                      | 1644.0                                                         |
| Crystal size/mm <sup>3</sup>                | ? × ? × ?                                                      |
| Radiation                                   | MoKα (λ = 0.71073)                                             |
| 2θ range for data collection/°              | 6.074 to 73.248                                                |
| Index ranges                                | -30 ≤ h ≤ 29, -16 ≤ k ≤ 15, -28 ≤ l ≤ 25                       |
| Reflections collected                       | 109489                                                         |
| Independent reflections                     | 14073 [R <sub>int</sub> = 0.1807, R <sub>sigma</sub> = 0.1939] |
| Data/restraints/parameters                  | 14073/1/417                                                    |
| Goodness-of-fit on F <sup>2</sup>           | 0.941                                                          |
| Final R indexes [I ≥ 2σ (I)]                | R <sub>1</sub> = 0.0787, wR <sub>2</sub> = 0.1646              |
| Final R indexes [all data]                  | R <sub>1</sub> = 0.2132, wR <sub>2</sub> = 0.2167              |
| Largest diff. peak/hole / e Å <sup>-3</sup> | 1.54/-1.36                                                     |
| Flack parameter                             | -0.09(3)                                                       |
| CCDC Reference                              | 1578308                                                        |

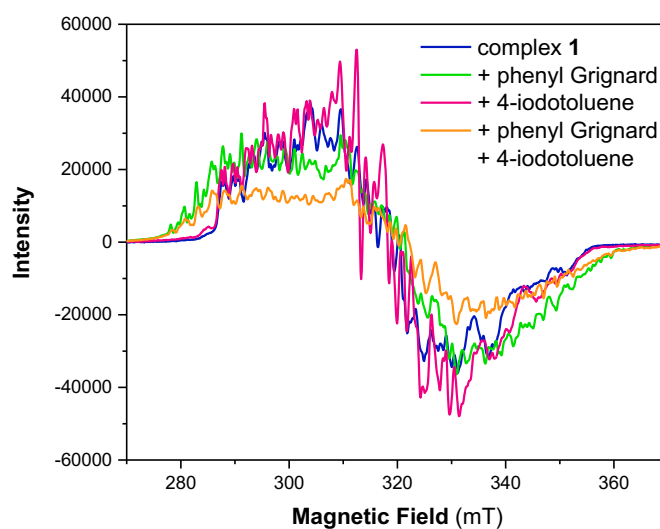

**Figure S2.** EPR Spectrum of complex **1** (blue) and its reaction solutions with 1 equiv. phenyl Grignard (green), 1 equiv. 4-iodotoluene (red) and with both 1 equiv. phenyl Grignard and 1 equiv. 4-iodotoluene (orange) in THF. Experimental conditions: T = 10 K, frequency 9.63 GHz, microwave power 2 mW, modulation amplitude 0.3 mT.

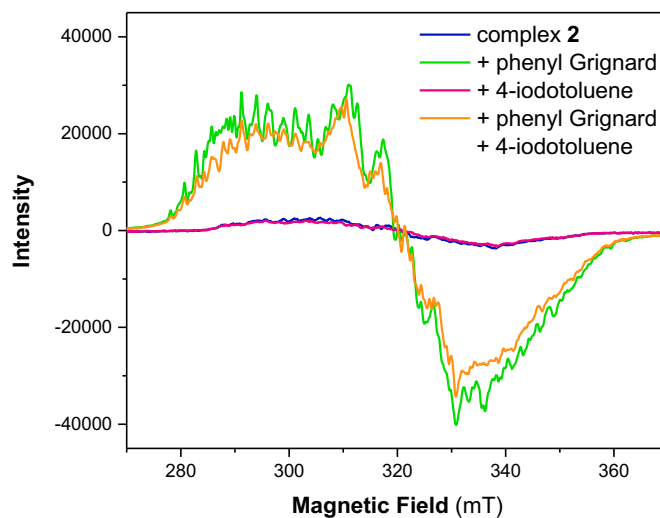

**Figure S3.** EPR Spectrum of complex **2** (blue) and its reaction solutions with 1 equiv. phenyl Grignard (green), 1 equiv. 4-iodotoluene (red) and with both 1 equiv. phenyl Grignard and 1 equiv. 4-iodotoluene (orange) in THF. Experimental conditions: T = 10 K, frequency 9.63 GHz, microwave power 2 mW, modulation amplitude 0.3 mT.

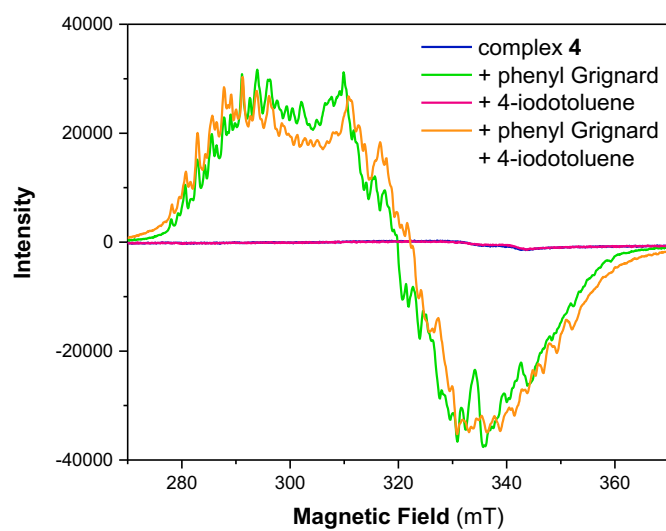

**Figure S4.** EPR Spectrum of complex **4** (blue) and its reaction solutions with 1 equiv. phenyl Grignard (green), 1 equiv. 4-iodotoluene (red) and with both 1 equiv. phenyl Grignard and 1 equiv. 4-iodotoluene (orange) in THF. Experimental conditions: T = 10 K, frequency 9.63 GHz, microwave power 2 mW, modulation amplitude 0.3 mT.

# NMR- and GC-MS-Data for Kumada coupling products

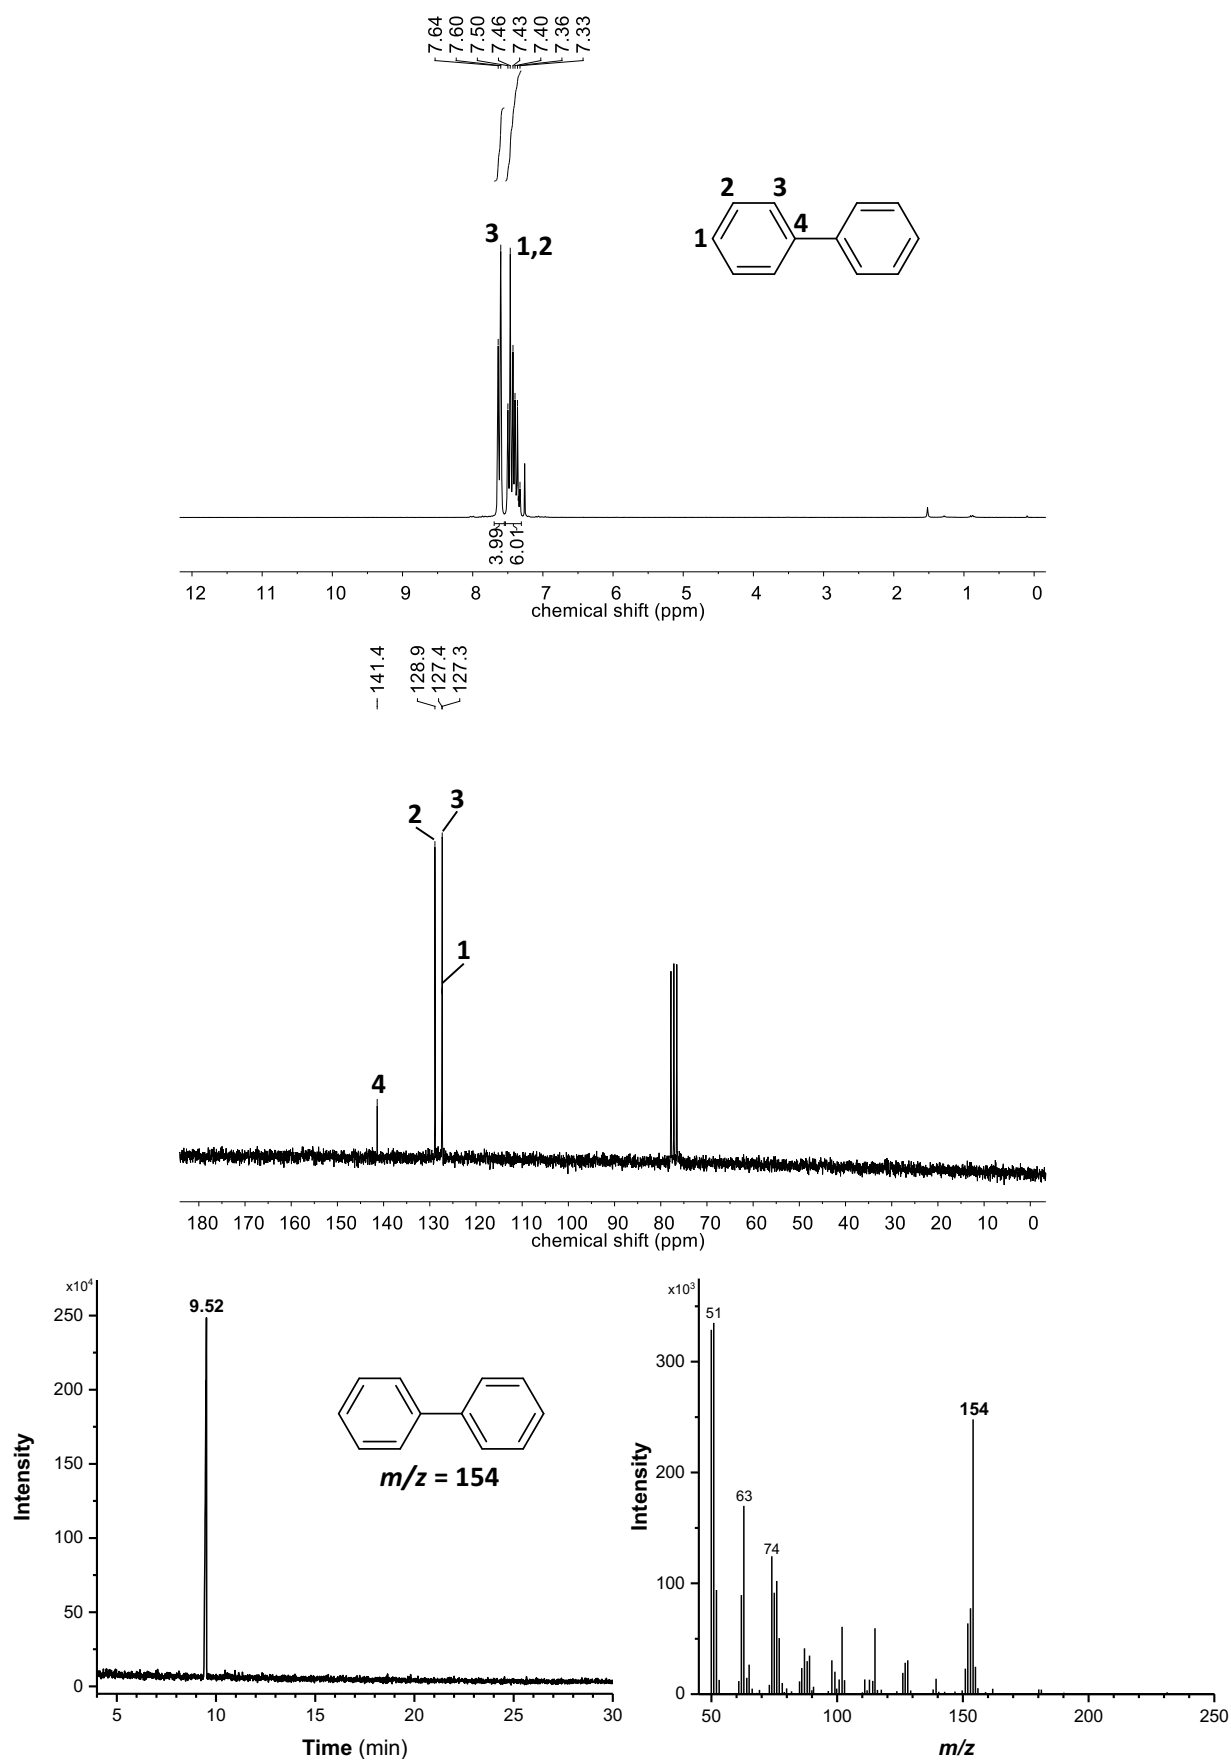

Figure S5. <sup>1</sup>H NMR (200 MHz) and <sup>13</sup>C NMR (50 MHz) spectra and GC-MS of 1,1'-biphenyl (P1).

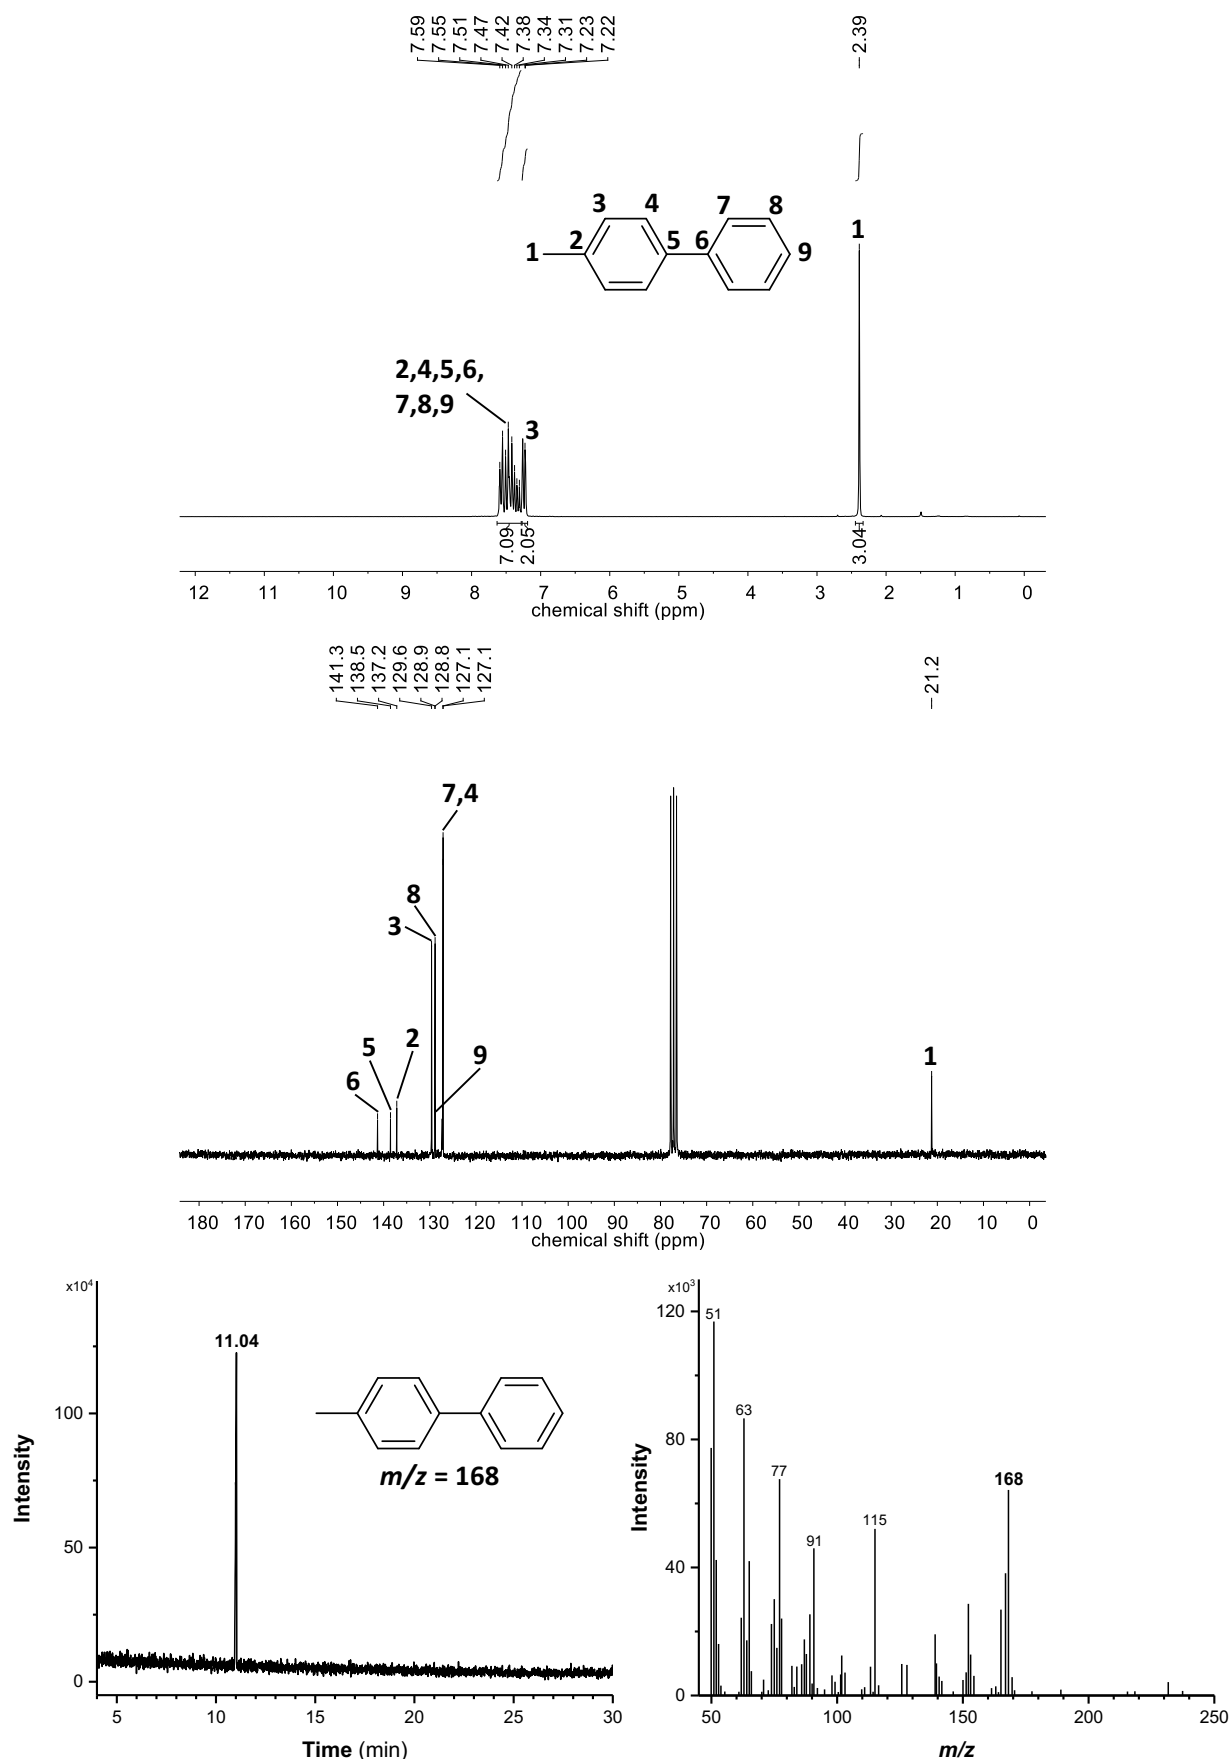

Figure S6.  $^1\text{H}$  NMR (200 MHz) and  $^{13}\text{C}$  NMR (50 MHz) spectra and GC-MS of 4-methyl-1,1'-biphenyl (**P2**).



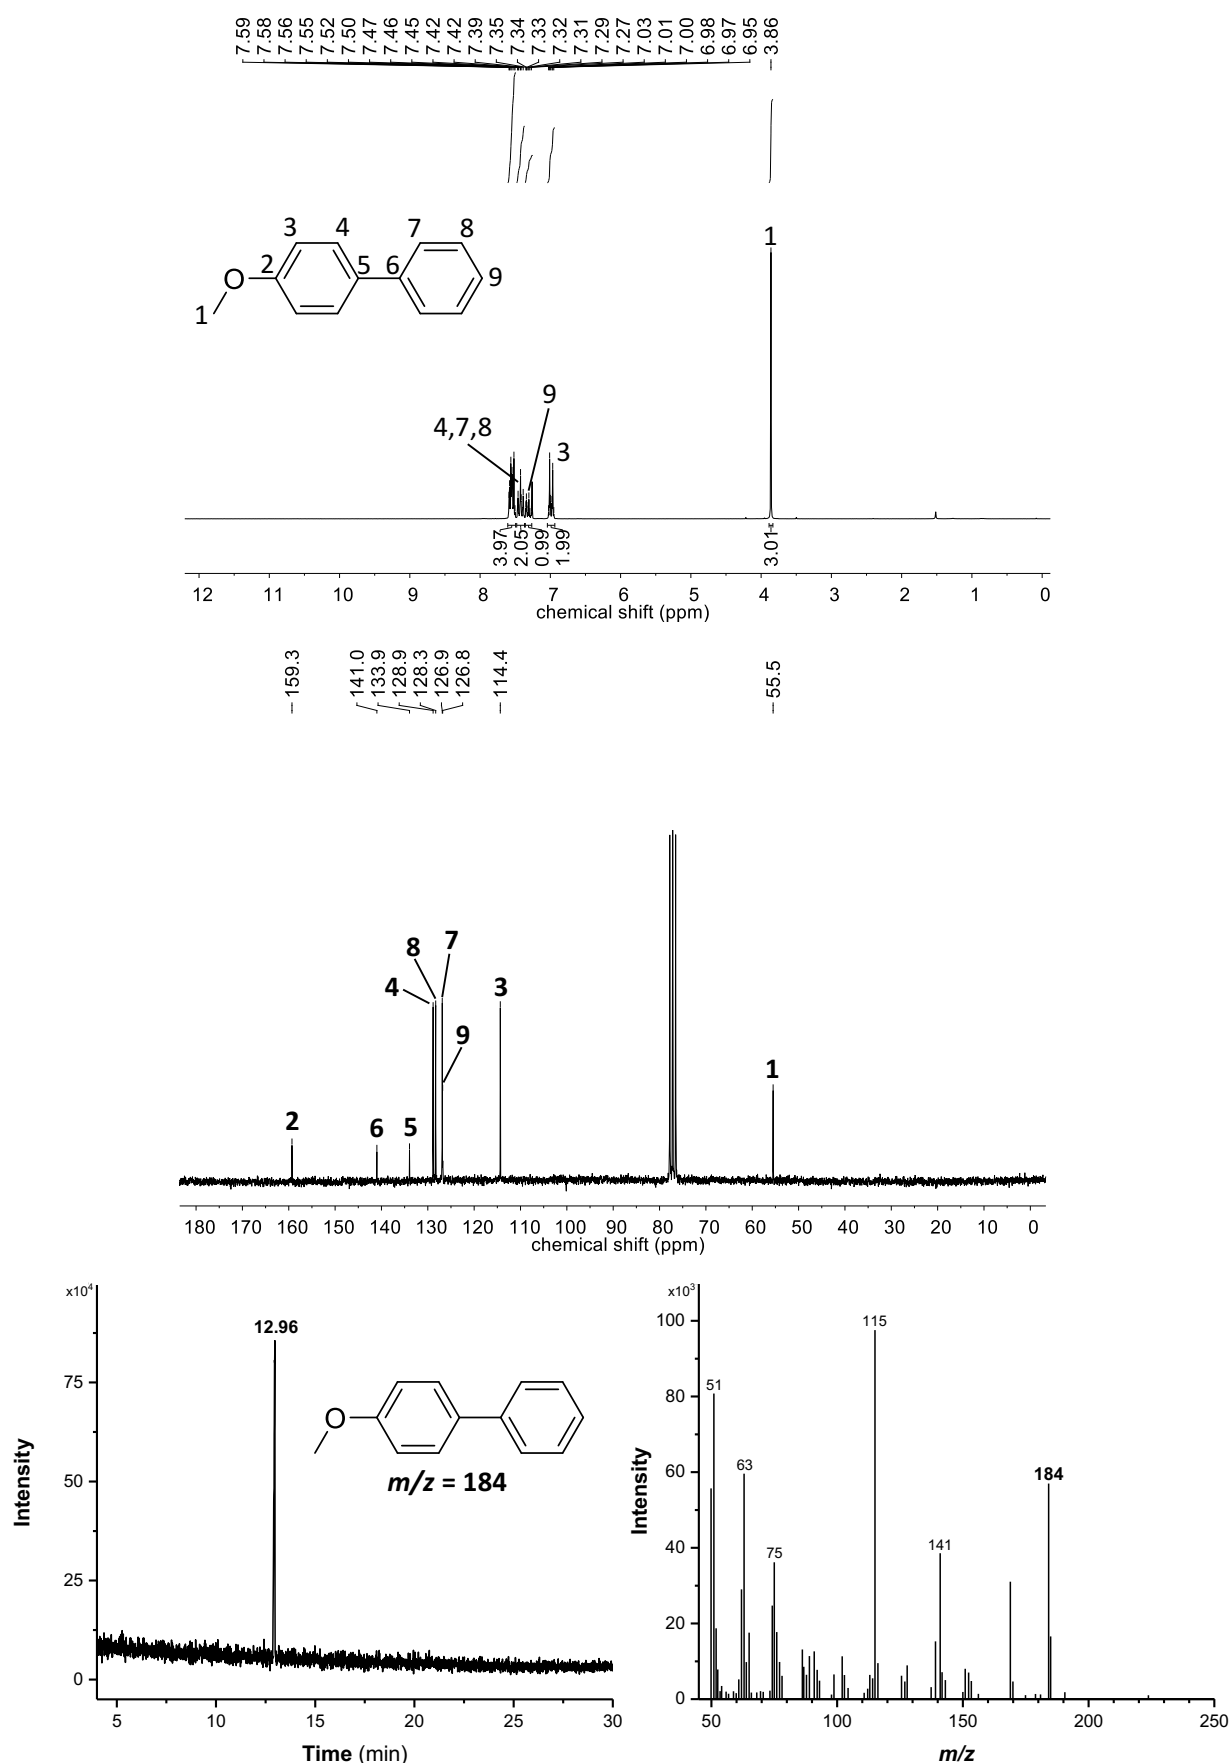

**Figure S7.**  $^1\text{H}$  NMR (200 MHz) and  $^{13}\text{C}$  NMR (50 MHz) spectra and GC-MS of 4-methoxy-1,1'-biphenyl (**P3**).

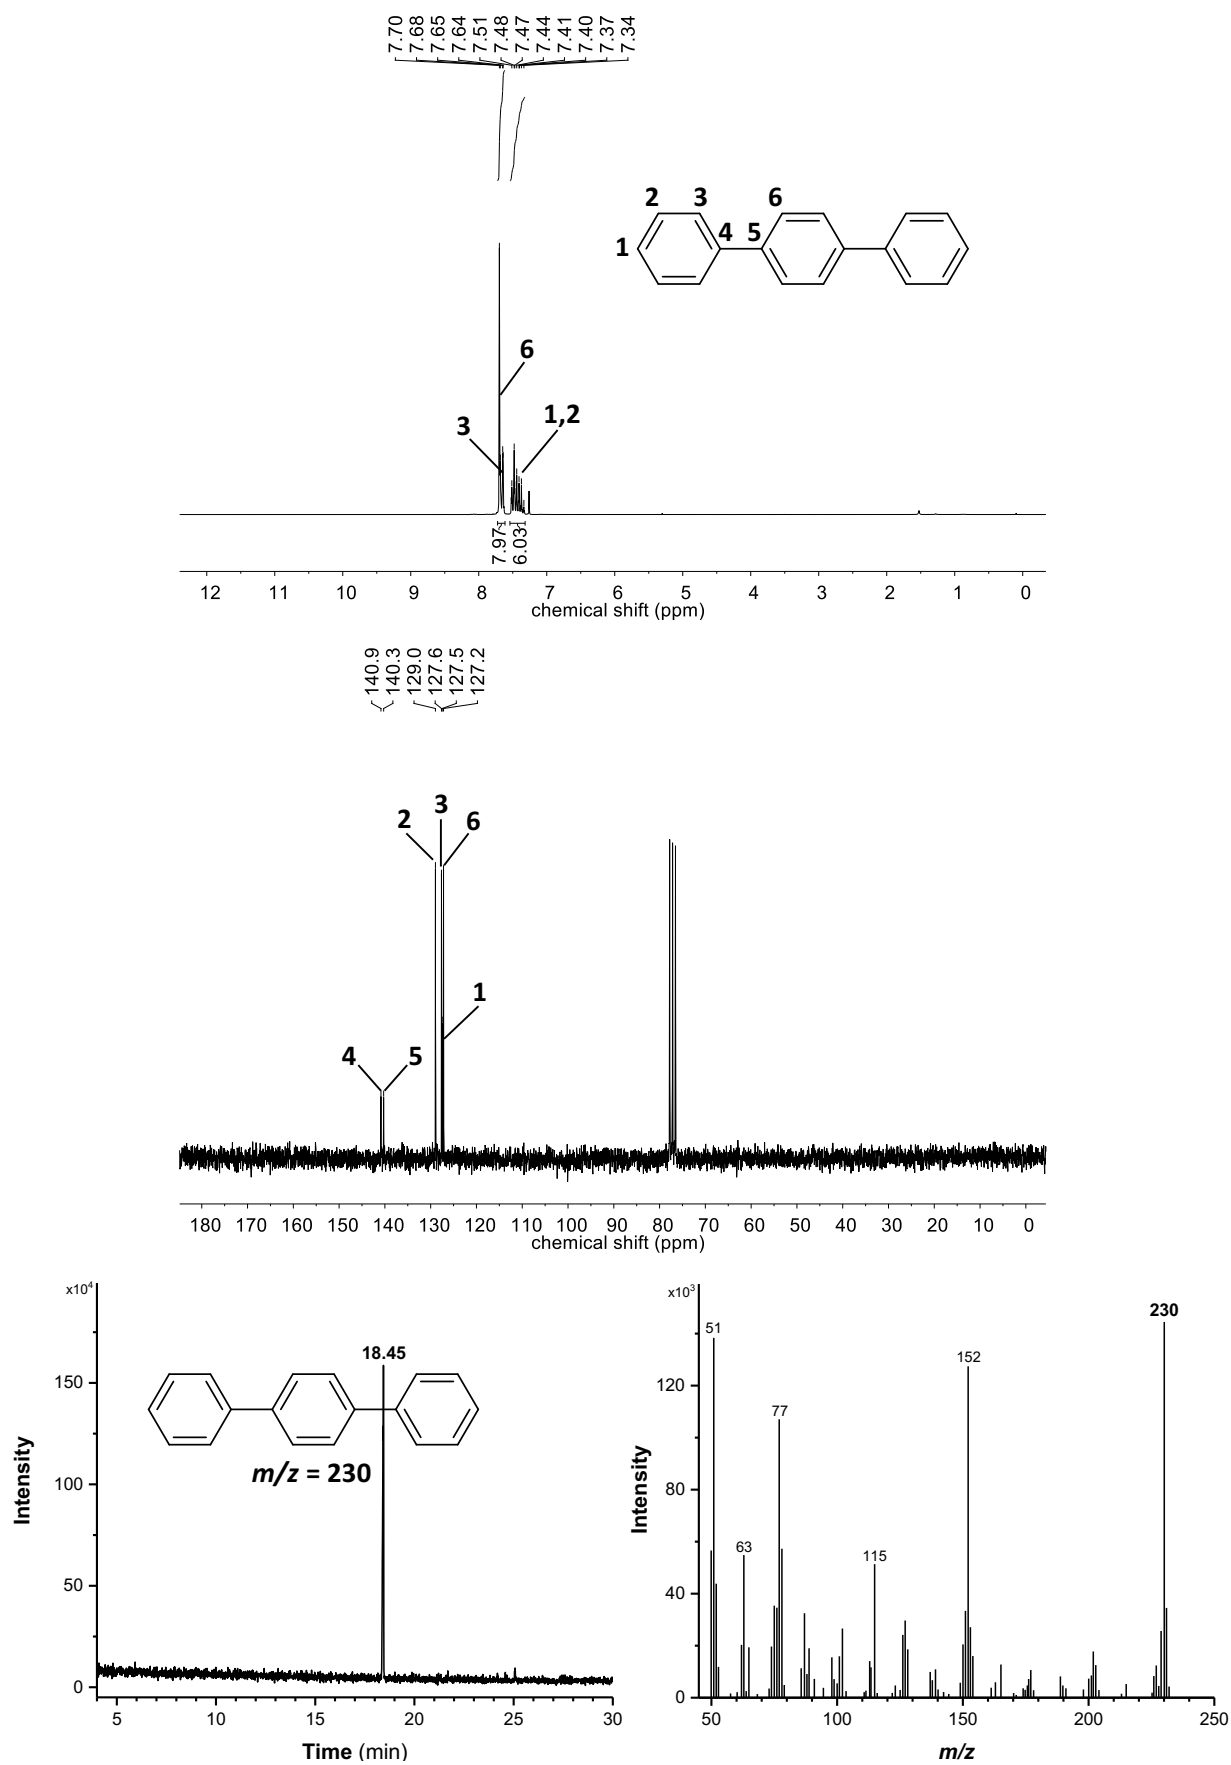

**Figure S10.**  $^1\text{H}$  NMR (200 MHz) and  $^{13}\text{C}$  NMR (50 MHz) and GC-MS of 1,4-biphenylbenzene (**P4**).

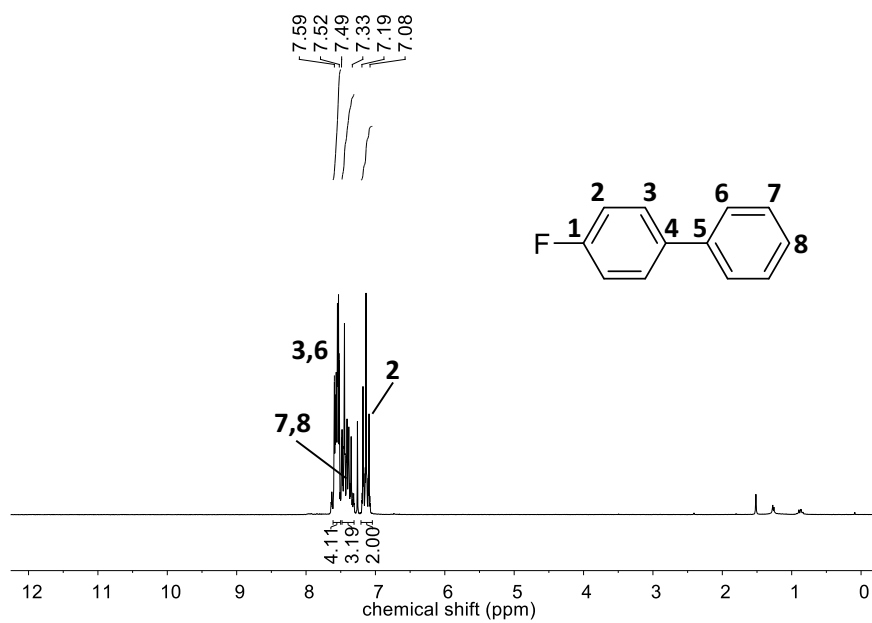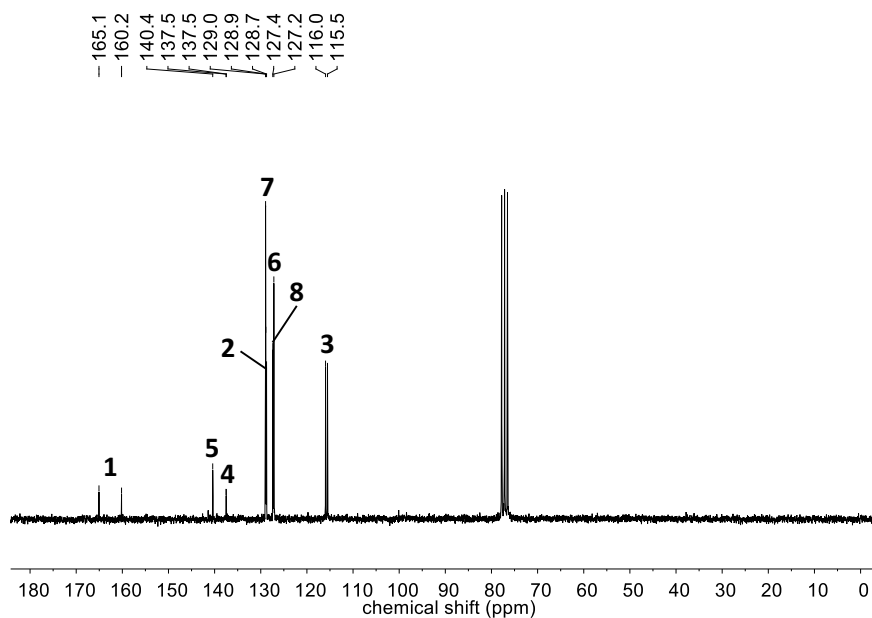

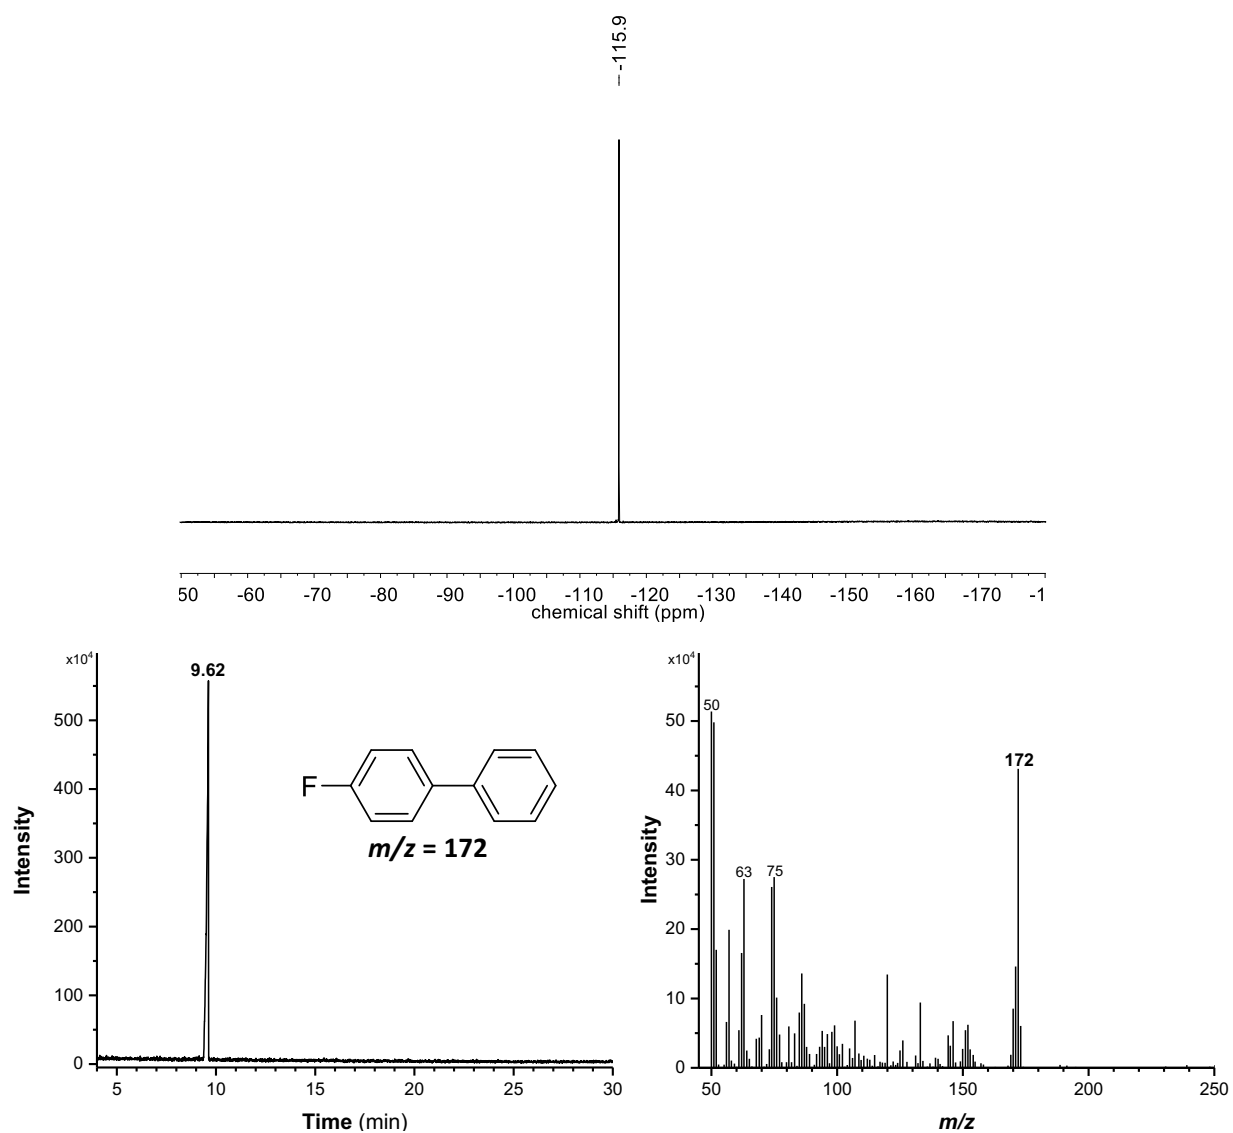

**Figure S8.**  $^1\text{H}$  NMR (200 MHz),  $^{13}\text{C}$  NMR (50 MHz) and  $^{19}\text{F}$  NMR (235 MHz) spectra and GC-MS of 4-fluoro-1,1'-biphenyl (**P5**).

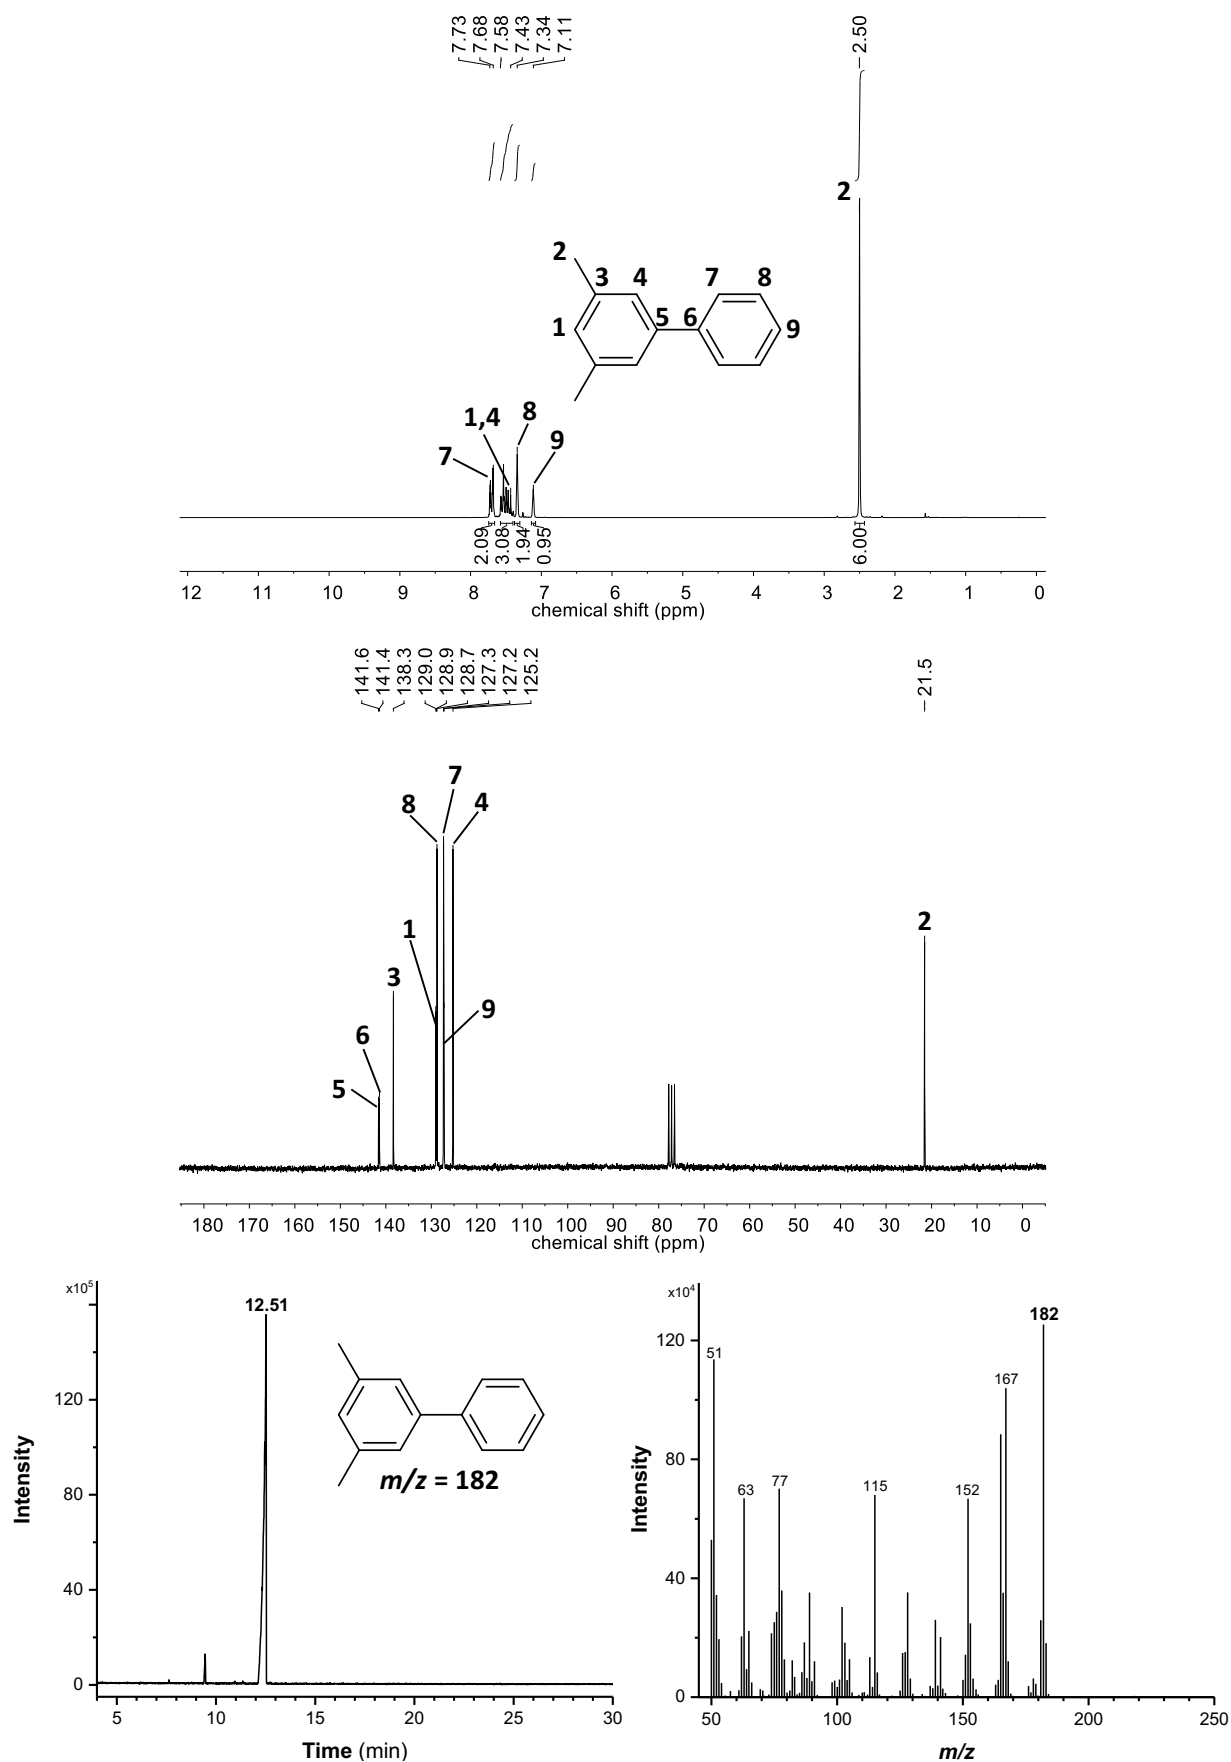

Figure S9.  $^1\text{H}$  NMR (200 MHz) and  $^{13}\text{C}$  NMR (50 MHz) and GC-MS of 3,5-dimethyl-1,1'-biphenyl (P6).

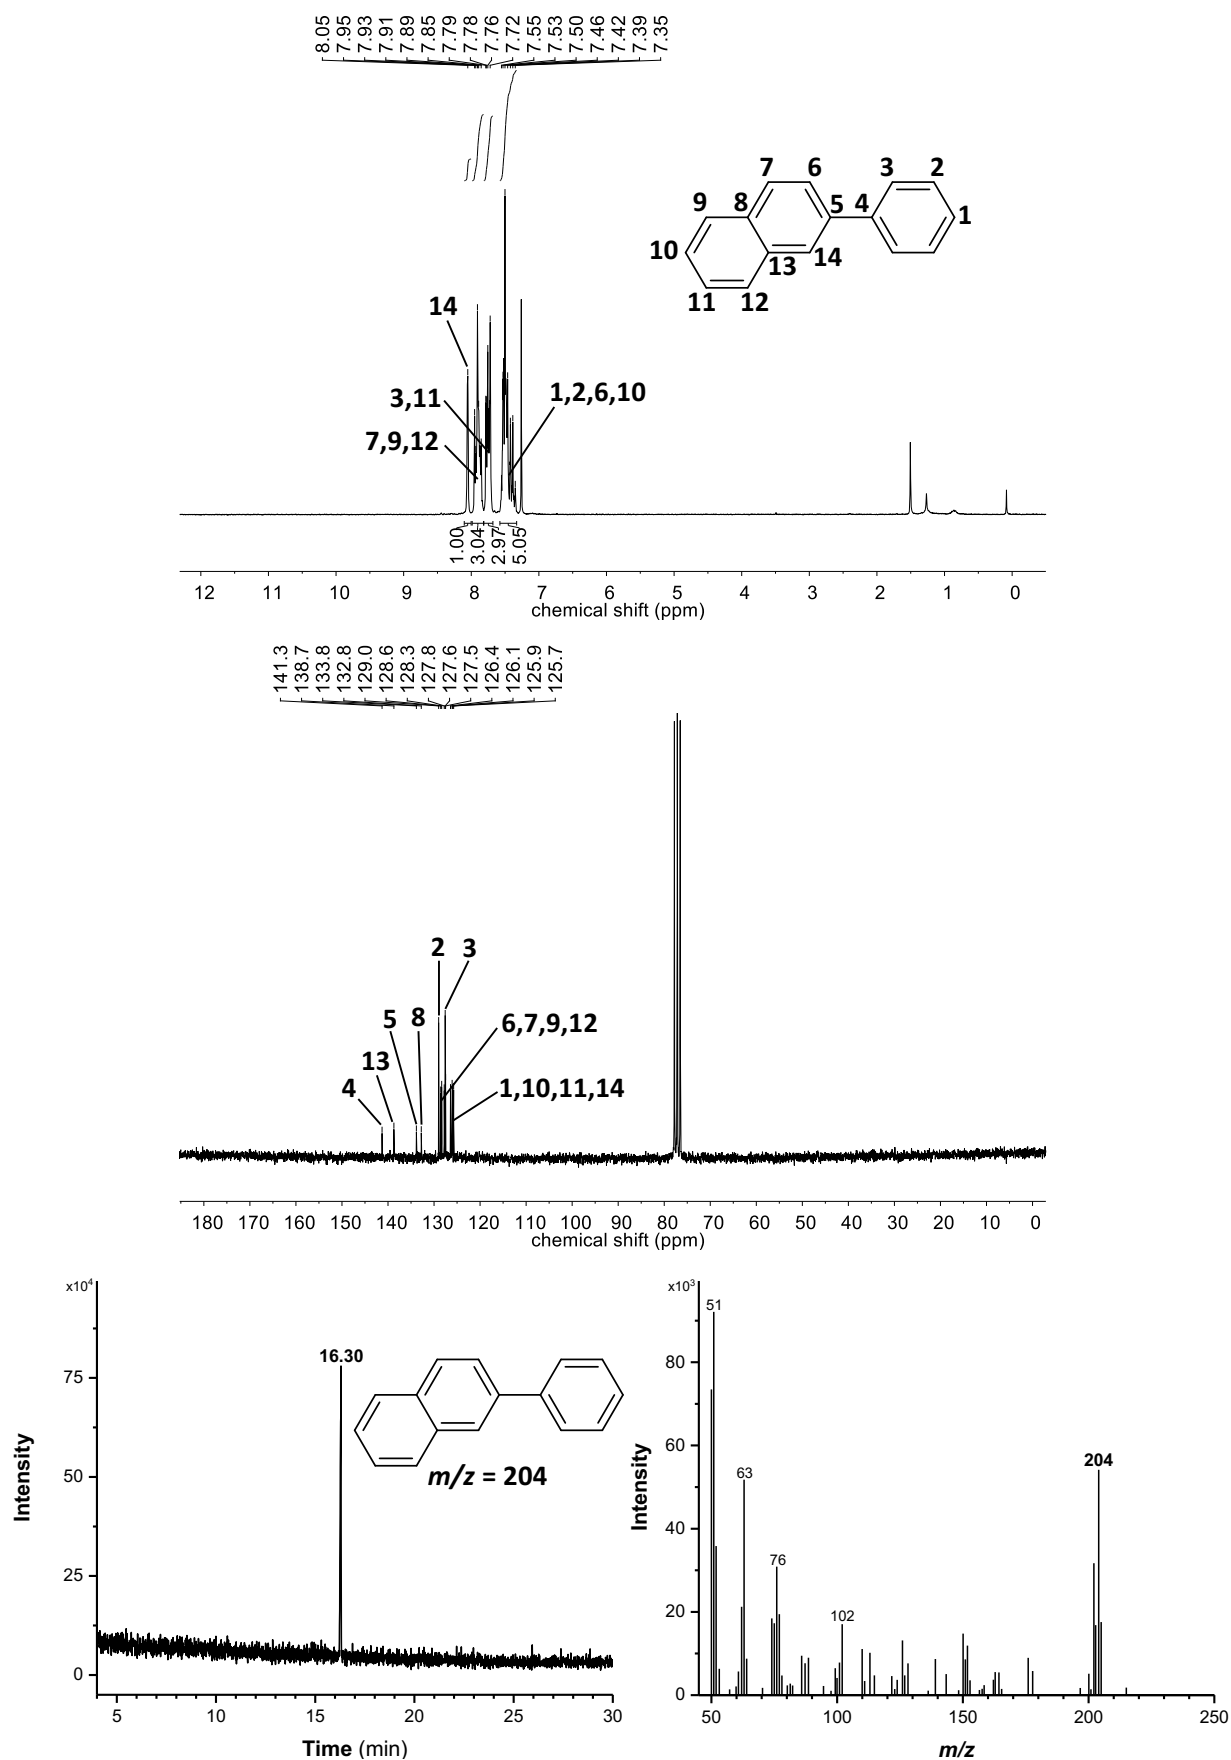

**Figure S11.**  $^1\text{H}$  NMR (200 MHz) and  $^{13}\text{C}$  NMR (50 MHz) and GC-MS of 2-phenylnaphthalene (P7).

## Cartesian coordinates [Angstrom] of geometry-optimized models used in the calculations

### [TriphosNiCl]

|    |                   |                   |                   |
|----|-------------------|-------------------|-------------------|
| Ni | 9.22961673484519  | 0.76513251222575  | 0.64387181601814  |
| P  | 11.32242516543792 | 1.37551328381263  | 0.50753786938042  |
| P  | 9.50819890254801  | -0.15138385630870 | 2.61483881539301  |
| P  | 8.54954222836968  | 2.75948880416634  | 1.28619541372941  |
| C  | 12.59522682609535 | 0.14665595641284  | -0.04904717279704 |
| C  | 9.80710671588861  | 3.45581585295896  | 2.49381729271549  |
| H  | 10.41644806862734 | 4.19402902427379  | 1.93055386448467  |
| H  | 9.28762694290967  | 4.02873167942564  | 3.29086327632570  |
| C  | 8.10088147875377  | 6.55463804232356  | -0.47076614586301 |
| H  | 8.37407439847083  | 7.60132545524166  | -0.26185372210310 |
| C  | 11.91175111478222 | 1.98401021935903  | 2.17423948990070  |
| H  | 12.48654921245941 | 1.15870938303795  | 2.64401878392166  |
| H  | 12.62038683238389 | 2.82584159036368  | 2.02931491315304  |
| C  | 7.42090203378373  | 3.88266314170866  | -0.99579168124347 |
| H  | 7.17636146532167  | 2.82864547426944  | -1.21121489590149 |
| C  | 10.78247443366500 | 2.43037694979660  | 3.15790500553600  |
| C  | 8.14341215137669  | 4.19772827411509  | 0.17900271328200  |
| C  | 14.80520119618387 | -0.89341236804092 | -0.03273311038041 |
| H  | 15.81243598170299 | -0.97457038408055 | 0.40505958305687  |
| C  | 6.94826794212630  | 2.69269239173984  | 2.24332193862396  |
| C  | 12.22922721865199 | -0.68534438513761 | -1.13158703211184 |
| H  | 11.20914744801828 | -0.61885097423246 | -1.54551998872133 |
| C  | 10.04153243936215 | 1.20840342190899  | 3.79721510242417  |
| H  | 9.11794648334623  | 1.57468910230806  | 4.29232514766474  |
| H  | 10.68031254493970 | 0.78499817460416  | 4.59956267138621  |
| C  | 10.77123026727588 | 2.95011396691443  | -1.74459122617985 |
| H  | 9.85664581765243  | 2.33687304955365  | -1.77754398846583 |
| C  | 8.48233623839621  | 5.54439954679821  | 0.43148820964192  |
| H  | 9.04050006041146  | 5.82530612272394  | 1.33775450223630  |
| C  | 12.85615558890582 | 3.54381260685777  | -0.63255304509470 |
| H  | 13.59513673791643 | 3.39684154510953  | 0.17174411770225  |
| C  | 11.48213698260577 | 3.18102031218113  | 4.32020317011617  |
| H  | 11.95971647969507 | 4.11502849375419  | 3.95879745462580  |
| H  | 12.26871469027036 | 2.54939883656366  | 4.78290020035300  |
| H  | 10.75041157493065 | 3.45238436573325  | 5.10836705478663  |
| C  | 13.09797396564927 | 4.52129632128604  | -1.61307943852337 |
| H  | 14.01131630210335 | 5.13460376961584  | -1.55867750458019 |
| C  | 6.58582657168674  | 3.64049696313797  | 3.22581311653270  |
| H  | 7.27339765128691  | 4.45814095330266  | 3.49573577657459  |
| C  | 13.14894221509418 | -1.60046537634110 | -1.66794950808274 |
| H  | 12.85384241749052 | -2.23845445681898 | -2.51581549852859 |
| C  | 4.77465640965943  | 1.60784658284284  | 2.52902001155099  |
| H  | 4.06852832210592  | 0.80952324229262  | 2.25178716985018  |
| C  | 12.51719615437921 | -3.72372411465788 | 3.04139819759612  |
| H  | 13.20295908095622 | -4.58234927817826 | 3.11756178849580  |
| C  | 6.03164590206915  | 1.67402814998859  | 1.90268580784912  |
| H  | 6.31348244647395  | 0.93376285797442  | 1.13595637844285  |
| C  | 11.47196786126689 | -1.76152856944422 | 4.04279116291150  |

|    |                   |                   |                   |
|----|-------------------|-------------------|-------------------|
| H  | 11.34172651781384 | -1.10825784368398 | 4.92050708649958  |
| C  | 7.37057519943789  | 6.23448990794859  | -1.62862227110812 |
| H  | 7.06927823222722  | 7.02795168309606  | -2.33017490877845 |
| C  | 11.80650332783266 | -3.49008971834552 | 1.85094445856185  |
| H  | 11.93514292096583 | -4.16267299000690 | 0.98820475473033  |
| C  | 13.89053785297062 | 0.03333586506650  | 0.49894200875830  |
| H  | 14.20341473345248 | 0.66592754317019  | 1.34410574364156  |
| C  | 10.75867307130807 | -1.51661721927130 | 2.84898575132333  |
| C  | 11.68750429243354 | 2.75238312894245  | -0.69013999180173 |
| C  | 7.02939442537240  | 4.89370653911451  | -1.88743293353140 |
| H  | 6.46362462618260  | 4.63136953169716  | -2.79536930927180 |
| C  | 14.43992547762861 | -1.70730265992357 | -1.11865089395378 |
| H  | 15.16117062421262 | -2.42739205144179 | -1.53584280595038 |
| C  | 4.42480650783484  | 2.54913542398359  | 3.51213211189101  |
| H  | 3.44304315117376  | 2.49404576877452  | 4.00773362646797  |
| C  | 11.02032985268346 | 3.92034197436903  | -2.73113332505997 |
| H  | 10.29727856746663 | 4.06586111699450  | -3.54878607807853 |
| C  | 12.18162816302516 | 4.70920311868249  | -2.66526407072114 |
| H  | 12.37512944027536 | 5.47354448168444  | -3.43450779935367 |
| C  | 5.33442374063769  | 3.56474801424339  | 3.86121271700601  |
| H  | 5.06632473773853  | 4.30847170403576  | 4.62853835945764  |
| C  | 12.35054968672877 | -2.85519821981651 | 4.13535370826894  |
| H  | 12.90193788621408 | -3.03364340222017 | 5.07212882361548  |
| C  | 7.14812930217577  | -1.64797552979144 | 2.64374014043210  |
| H  | 7.29013580543462  | -1.63685513267571 | 1.54926003028758  |
| C  | 7.85408234064596  | -0.92686316337374 | 4.86159572178064  |
| H  | 8.55047472748476  | -0.38999393172809 | 5.52434141117687  |
| C  | 5.86274264077336  | -2.31113848061190 | 4.60511946834825  |
| H  | 5.00691900570734  | -2.84161526790291 | 5.05159212663006  |
| C  | 6.06107274470684  | -2.33331739797532 | 3.21302157038524  |
| H  | 5.35852199893320  | -2.87917309429439 | 2.56334442582771  |
| C  | 6.75877668530477  | -1.60364044644772 | 5.42657452827617  |
| H  | 6.60799111458193  | -1.58083707821991 | 6.51798770279450  |
| C  | 8.05865342320817  | -0.94553675180671 | 3.46456580071564  |
| C  | 10.94022137063726 | -2.38869361545808 | 1.75320531239888  |
| H  | 10.39415437968600 | -2.18579097747309 | 0.81786002051832  |
| Cl | 7.98242480277101  | -0.28951614177713 | -0.90139322587009 |

# [BrMgPh]

|    |                   |                   |                  |
|----|-------------------|-------------------|------------------|
| C  | 7.01103561974184  | -1.89737578251604 | 2.56343372917841 |
| H  | 7.09088593172200  | -1.97444259578793 | 1.46331030436776 |
| C  | 7.77632023843227  | -1.08864574619987 | 4.70187268867968 |
| H  | 8.47508640714087  | -0.50980662122703 | 5.33337248337556 |
| C  | 5.80846452695581  | -2.52415941495458 | 4.59005831132593 |
| H  | 4.98429978159767  | -3.06019075110609 | 5.08834275234555 |
| C  | 5.95360395776097  | -2.58548479790656 | 3.19228814289930 |
| H  | 5.23998695391667  | -3.17307161742882 | 2.59033077103518 |
| C  | 6.72511129582131  | -1.77164364451248 | 5.34623380623540 |
| H  | 6.62001292971250  | -1.71709524693008 | 6.44328614104112 |
| C  | 7.95760518143448  | -1.12660852511999 | 3.29211549876002 |
| Mg | 9.56145166055455  | -0.12106256162219 | 2.34924708129476 |
| Br | 11.43394675420910 | 1.05908017831166  | 1.33576413946133 |



**BrMgCl**

|    |                  |                   |                   |
|----|------------------|-------------------|-------------------|
| Mg | 7.67348780139508 | -1.20526581434906 | -4.32241003672183 |
| Br | 5.96359395400313 | -0.05447264471406 | -5.57571941264637 |
| Cl | 9.27357353760179 | -2.28405416593688 | -3.16097143863179 |

**Iodobenzene**

|   |                   |                   |                   |
|---|-------------------|-------------------|-------------------|
| C | -0.75533517640803 | -0.00006184380112 | -2.98822006998653 |
| C | -1.91834407640854 | -0.35633867329729 | -2.28279997192997 |
| C | 0.40765554614598  | 0.35628398793179  | -2.28280180156846 |
| H | -2.83411459457273 | -0.63747391987430 | -2.82620742450466 |
| H | 1.32331922099330  | 0.63775958540950  | -2.82620663295795 |
| C | -1.92798840738217 | -0.35948660372789 | -0.87532724621978 |
| C | 0.41727323836999  | 0.35951678490158  | -0.87532905795245 |
| H | -2.83995187857718 | -0.64029853120903 | -0.32859937990013 |
| H | 1.32932687173166  | 0.64003728707613  | -0.32859379539437 |
| C | -0.75536203192533 | 0.00002925885623  | -0.18773037438645 |
| H | -0.75533961441554 | -0.00006349686251 | -4.08931295356282 |
| I | -0.75538560155140 | 0.00009616459691  | 1.94956892836356  |

**[TriphosNiPh]**

|    |                   |                   |                   |
|----|-------------------|-------------------|-------------------|
| Ni | 9.22675716351875  | 0.73719060156183  | 0.44115840390732  |
| P  | 11.36732270847740 | 1.33989637099098  | 0.43476121474174  |
| P  | 9.40929211419596  | -0.26212622201077 | 2.41201585954010  |
| P  | 8.53657140875227  | 2.72286649516774  | 1.11412423866603  |
| C  | 12.69118600957686 | 0.14914009667419  | -0.10259662413393 |
| C  | 9.75896405273396  | 3.35118373407497  | 2.40383460831582  |
| H  | 10.39825484902464 | 4.10175879870924  | 1.89500265154590  |
| H  | 9.21008165684236  | 3.90447853333561  | 3.19469418910176  |
| C  | 8.50504588059857  | 6.58193004663888  | -0.59333430238679 |
| H  | 8.96775288875177  | 7.56570817002521  | -0.41628860695281 |
| C  | 11.88736212457836 | 1.89866047857681  | 2.14429416074168  |
| H  | 12.43567425551806 | 1.06079318536634  | 2.62233369852090  |
| H  | 12.60302961606114 | 2.74337918562915  | 2.05912543694947  |
| C  | 7.33682110015582  | 4.07089703346295  | -1.02236112474395 |
| H  | 6.87412309098763  | 3.08653595566083  | -1.20030130209642 |
| C  | 10.70642145744664 | 2.30839723276248  | 3.07865416443122  |
| C  | 8.22846723083264  | 4.23849081511121  | 0.06460510113613  |
| C  | 14.84984278935494 | -0.98513841927235 | 0.07525624328244  |
| H  | 15.78543949012310 | -1.15901569776163 | 0.62975294021780  |
| C  | 6.88428990458387  | 2.72231418703618  | 1.99351476241992  |
| C  | 12.45769933966637 | -0.53553968451940 | -1.31770725325213 |
| H  | 11.51098887859515 | -0.37347245581732 | -1.85991945483435 |
| C  | 9.95151670231532  | 1.06513357105211  | 3.63981630469185  |
| H  | 9.03602814668347  | 1.41711039678366  | 4.15832189018230  |
| H  | 10.57832943098752 | 0.58509329096479  | 4.41954347862932  |
| C  | 10.92325947324516 | 3.14654381720213  | -1.68589823717941 |
| H  | 9.95300465389566  | 2.62950608470229  | -1.74480173093405 |
| C  | 8.80888127578874  | 5.50978729410414  | 0.26630574100012  |
| H  | 9.50241904376470  | 5.68858596838081  | 1.10185800129750  |
| C  | 13.06974936461045 | 3.43638142387134  | -0.57855566293414 |

|   |                   |                   |                   |
|---|-------------------|-------------------|-------------------|
| H | 13.80277638184784 | 3.14448947801521  | 0.19082338580589  |
| C | 11.34196784536552 | 3.02351019680702  | 4.30017290321951  |
| H | 11.83015898842534 | 3.97247143280163  | 3.99505398145829  |
| H | 12.11025791900343 | 2.38086128949240  | 4.77837732259283  |
| H | 10.57139712738627 | 3.26308845290095  | 5.06151751864393  |
| C | 13.39116279076491 | 4.46852502360348  | -1.47566865673851 |
| H | 14.36084024603104 | 4.98395811831874  | -1.39157106070876 |
| C | 6.54521262956159  | 3.63760884962370  | 3.01515459321960  |
| H | 7.27616318051306  | 4.38245517628577  | 3.36773517739478  |
| C | 13.41295765388643 | -1.42416624678918 | -1.83522257527589 |
| H | 13.21714624658885 | -1.94417411031868 | -2.78575251974670 |
| C | 4.61875047871554  | 1.80352666721464  | 2.11370716302239  |
| H | 3.86773362676476  | 1.08210015622964  | 1.75542143215697  |
| C | 12.57224420055064 | -3.71409811980242 | 2.70315233111894  |
| H | 13.30202466871040 | -4.53791508963918 | 2.75050534914223  |
| C | 5.90899250310590  | 1.80062141377158  | 1.55425375513506  |
| H | 6.17926476158282  | 1.06990785221151  | 0.77518455835105  |
| C | 11.32617098215450 | -1.93446020572271 | 3.80836188057909  |
| H | 11.07535515733843 | -1.39188480519570 | 4.73392274202923  |
| C | 7.61415341608856  | 6.40511457023154  | -1.66477740329006 |
| H | 7.37455130854705  | 7.24690175380293  | -2.33318744751384 |
| C | 11.95003290778264 | -3.39087243880243 | 1.48570567820443  |
| H | 12.19076323539315 | -3.95691273369671 | 0.57284196362199  |
| C | 13.89770878488475 | -0.08565614979223 | 0.58923108200933  |
| H | 14.11424815112448 | 0.42900787357877  | 1.53737873499364  |
| C | 10.70320555546642 | -1.59431668863225 | 2.58633518325669  |
| C | 11.82779695637143 | 2.76894660678014  | -0.67374264764531 |
| C | 7.02817767286520  | 5.14230931826255  | -1.87478448849974 |
| H | 6.32696835371167  | 4.98889267720583  | -2.71060870381294 |
| C | 14.61359716303243 | -1.65355691885510 | -1.13740743134893 |
| H | 15.36329514033132 | -2.35372176665805 | -1.53811535041644 |
| C | 4.29293688012427  | 2.71067054528203  | 3.13643989750890  |
| H | 3.28592982123529  | 2.70693958412369  | 3.58203173440889  |
| C | 11.24733543548440 | 4.17357505388029  | -2.59017723388361 |
| H | 10.52681769914453 | 4.45883239706934  | -3.37224521629289 |
| C | 12.48058913232583 | 4.83817111494058  | -2.48437649931782 |
| H | 12.73487049739570 | 5.64684979818103  | -3.18769156235364 |
| C | 5.26208571227431  | 3.62467479297949  | 3.58970526981261  |
| H | 5.01668096984742  | 4.34050872556531  | 4.39049642354833  |
| C | 12.26033070258727 | -2.98216159311990 | 3.86428230482618  |
| H | 12.74158535090701 | -3.23465982842208 | 4.82221862850304  |
| C | 7.86894727821912  | -2.48406246215251 | 3.32957140459321  |
| H | 8.61510756402715  | -3.10472831657308 | 2.81079000870206  |
| C | 7.03473364848097  | -0.31702422438121 | 4.03383981570640  |
| H | 7.09528124046213  | 0.78146543389223  | 4.06062462542628  |
| C | 5.82428213985242  | -2.34426056019776 | 4.65132403982206  |
| H | 4.97732978675546  | -2.83474565970249 | 5.15620401133540  |
| C | 6.78599779075021  | -3.11029577164069 | 3.96837159360845  |
| H | 6.69874260732853  | -4.20838590496780 | 3.93594613390408  |
| C | 5.95606191524867  | -0.94509574985760 | 4.68052565054597  |
| H | 5.21016976128043  | -0.32972566421430 | 5.20807739805770  |
| C | 8.01749925503694  | -1.07514567025924 | 3.35531164272057  |
| C | 11.02726759902022 | -2.33189425411398 | 1.42800077970807  |

|   |                   |                   |                   |
|---|-------------------|-------------------|-------------------|
| H | 10.54496680761290 | -2.06064462063275 | 0.47548873305867  |
| C | 7.89141456184783  | -0.16644287996385 | -0.64079216743247 |
| C | 7.70283370774655  | 0.29640372856379  | -1.97790669155103 |
| C | 7.22559436449516  | -1.38462098323938 | -0.32604135241745 |
| C | 6.95879156862187  | -0.42009349027021 | -2.93669707624994 |
| C | 6.46752457492538  | -2.10675089868894 | -1.26843123977259 |
| C | 6.33316604328800  | -1.63086484184417 | -2.58635518703383 |
| H | 8.15824611917098  | 1.25080643658946  | -2.29596362088765 |
| H | 7.30642931100671  | -1.79354977585186 | 0.69562876282310  |
| H | 6.85879911029776  | -0.02473288464944 | -3.96210535109202 |
| H | 5.98284925231560  | -3.05267820088572 | -0.97265064348165 |
| H | 5.74302904031921  | -2.19195662013606 | -3.32896290268345 |

### [ $\kappa^2$ -TriphosNiPh<sub>2</sub>l]

|    |                   |                   |                   |
|----|-------------------|-------------------|-------------------|
| Ni | 8.09182161107628  | 0.56270796339273  | 0.62433454402369  |
| P  | 12.13675382974076 | 0.82964622707819  | 0.36135899828292  |
| P  | 10.43403481471363 | -1.21010390941653 | 3.24621967097944  |
| P  | 7.92392037648696  | 2.71124526526263  | 1.72736367994454  |
| C  | 13.67692449053112 | 0.37828875407413  | 1.23526880525476  |
| C  | 9.29564554341989  | 2.84682261159322  | 2.95841042160264  |
| H  | 9.78443694931966  | 3.83062671974607  | 2.76929423644303  |
| H  | 8.86935562218157  | 2.88128848914638  | 3.98524909764704  |
| C  | 8.73517269624455  | 6.42696674321685  | 0.10641869998130  |
| H  | 9.02102527998632  | 7.42215691208821  | 0.48505054638965  |
| C  | 10.48700427009471 | 1.40912602846134  | 1.32982985777572  |
| H  | 9.94247600067825  | 0.50710067165302  | 0.95604261859483  |
| H  | 10.24956532539128 | 2.30458273806512  | 0.68545630410194  |
| C  | 8.02091312254030  | 3.88188324788842  | -0.83942356552751 |
| H  | 7.71552603708315  | 2.90575279685710  | -1.22211715443314 |
| C  | 10.32599456352249 | 1.67239702225503  | 2.84677392352422  |
| C  | 8.17284974364009  | 4.08688948636523  | 0.53866631198092  |
| C  | 15.89989294249281 | 0.80050638494664  | 2.12169488099846  |
| H  | 16.65322096387340 | 1.51296566761784  | 2.47800901750920  |
| C  | 6.39703819844419  | 3.12023700401055  | 2.65668275675390  |
| C  | 13.97000316861027 | -1.00728089994391 | 1.21409536771209  |
| H  | 13.21667774687351 | -1.70844210249653 | 0.82915235539874  |
| C  | 9.65925395186519  | 0.45583283689091  | 3.56123149520719  |
| H  | 8.61270026845821  | 0.35579940087034  | 3.19076389735190  |
| H  | 9.58327197407140  | 0.67536949502626  | 4.64517265536652  |
| C  | 13.09229033443747 | 2.34994611086384  | -1.73295934397113 |
| H  | 13.10424434311297 | 1.36100329101460  | -2.22529451674658 |
| C  | 8.51953350082945  | 5.37480991595774  | 1.01631847769824  |
| H  | 8.63072847463815  | 5.57087666988069  | 2.09517338626957  |
| C  | 12.58533299307439 | 3.74247950171232  | 0.21556453372736  |
| H  | 12.23132481289616 | 3.86151606852184  | 1.25652800225897  |
| C  | 11.61833723925852 | 2.08512740352138  | 3.57074153744615  |
| H  | 12.10641057063202 | 2.96909550177624  | 3.11401987653735  |
| H  | 12.35817795063064 | 1.26628757705349  | 3.59347967124923  |
| H  | 11.36991688706880 | 2.35230548862702  | 4.60741327546425  |
| C  | 13.01665296792081 | 4.87269262076595  | -0.50185747550322 |
| H  | 12.98568405830943 | 5.86407246648239  | -0.02504288588412 |
| C  | 6.27235530265031  | 2.81065756191075  | 4.02498847659064  |
| H  | 7.10139647503146  | 2.34365922884435  | 4.58412291433660  |
| C  | 15.23524286591931 | -1.47851656257121 | 1.60726702841777  |
| H  | 15.46887552111725 | -2.55232975302973 | 1.54789774448418  |

|   |                   |                   |                   |
|---|-------------------|-------------------|-------------------|
| C | 4.13971626636857  | 4.07229387225650  | 2.68590941528358  |
| H | 3.30899023017029  | 4.57581726776086  | 2.15790050833681  |
| C | 13.59182743782183 | -1.91678752941857 | 6.59931418305996  |
| H | 14.34637297464839 | -2.09159239331484 | 7.37749247315088  |
| C | 5.32072069601553  | 3.75421721474362  | 1.98945376579424  |
| H | 5.40070988436603  | 4.01734484145312  | 0.92564194697837  |
| C | 11.39146795713810 | -1.09512522023340 | 5.94187196295434  |
| H | 10.43271683973757 | -0.63826853555792 | 6.22555789917132  |
| C | 8.59690819617681  | 6.20855580216291  | -1.27374366031291 |
| H | 8.77040030837696  | 7.03467513984774  | -1.98433072041488 |
| C | 13.85246115131875 | -2.30021938023936 | 5.28074412782380  |
| H | 14.80910812529891 | -2.77160201341739 | 5.01277430310839  |
| C | 14.65718710370444 | 1.28267312621168  | 1.68634800756422  |
| H | 14.47787027609074 | 2.37020580372554  | 1.67972579544641  |
| C | 11.65258776554007 | -1.46048695538960 | 4.60707903967779  |
| C | 12.62903494503497 | 2.46201038259569  | -0.39356376639478 |
| C | 8.23082221857002  | 4.93962449013963  | -1.74235663253886 |
| H | 8.11914620511497  | 4.75787385889230  | -2.81215522135910 |
| C | 16.19767118386776 | -0.57487817171827 | 2.07390047165002  |
| H | 17.18759203342060 | -0.93929124412146 | 2.39026076144310  |
| C | 4.02161117474704  | 3.76188535744029  | 4.04826240558416  |
| H | 3.09790671558592  | 4.01857904813886  | 4.59304106090167  |
| C | 13.52367768078355 | 3.48622597074908  | -2.43730916305377 |
| H | 13.87722102886548 | 3.37843961194782  | -3.47644807363371 |
| C | 13.49382132838062 | 4.74706623078988  | -1.82593191461900 |
| H | 13.83501561535262 | 5.63791503154539  | -2.37653054024248 |
| C | 5.09015006049224  | 3.13161223460527  | 4.71661170064610  |
| H | 5.01229364528907  | 2.89635333443729  | 5.78637287910146  |
| C | 12.36193912532358 | -1.31994501341508 | 6.92851807362147  |
| H | 12.15092274403746 | -1.02874533066359 | 7.96374217021688  |
| C | 9.49221367710955  | -3.76881713078812 | 3.86134650602657  |
| H | 10.55634872770432 | -4.05895299267098 | 3.77321497710065  |
| C | 7.72870358794172  | -2.08963666877383 | 3.81134575245435  |
| H | 7.38256482077000  | -1.05596655193629 | 3.71469540358107  |
| C | 7.16758014197765  | -4.40274749422447 | 4.25996470545712  |
| H | 6.41804318846168  | -5.17308058067744 | 4.47993603143072  |
| C | 8.53267739273962  | -4.74756680569098 | 4.14488054535603  |
| H | 8.85596926748231  | -5.78774718957135 | 4.27699676477907  |
| C | 6.76755957924746  | -3.07383981172257 | 4.08344859306838  |
| H | 5.70481845152548  | -2.78869406288270 | 4.17382259285697  |
| C | 9.10424488157994  | -2.41928845358622 | 3.70209709806549  |
| C | 12.87938108766492 | -2.07704846118902 | 4.28660667130726  |
| H | 13.08699994601275 | -2.37987921794763 | 3.25614319899764  |
| C | 6.25576502734035  | 0.48797805397496  | 0.20892940721047  |
| C | 5.97945078732413  | 0.72763380965711  | -1.15263768247393 |
| C | 5.24480416344618  | 0.45216200807937  | 1.16175446316364  |
| C | 4.65332612045078  | 0.94585088813277  | -1.55342547744252 |
| C | 3.91438373016553  | 0.67784105163129  | 0.74587016364568  |
| C | 3.62240189615569  | 0.93906739025799  | -0.59733672893035 |
| H | 6.82519217423419  | 0.73878796687838  | -1.83792816680572 |
| H | 5.44569109888622  | 0.26956838378750  | 2.22498797344678  |
| H | 4.40889402211192  | 1.13270462967877  | -2.61063609098686 |
| H | 3.11516957171496  | 0.66775353294654  | 1.49422696202115  |
| H | 2.58512548149561  | 1.14685889517281  | -0.90852224882185 |
| C | 8.44215048409469  | -0.98967898075428 | -0.37710232336160 |
| C | 9.06506239834358  | -0.77207446939217 | -1.64090490223588 |
| C | 8.12103776257797  | -2.31110039350764 | 0.03376711148803  |

|   |                  |                   |                    |
|---|------------------|-------------------|--------------------|
| C | 9.32862362489982 | -1.85735263983678 | -2.50371819949132  |
| C | 8.35516705143909 | -3.38356544973480 | -0.84212001887414  |
| C | 8.96669298975252 | -3.16087898986690 | -2.11164713387726  |
| H | 9.34283106988791 | 0.25258433958912  | -1.95790368255016  |
| H | 7.67862251873779 | -2.53356198243596 | 1.02477964796007   |
| H | 9.80081902610158 | -1.68006334379374 | -3.48747313224055  |
| H | 8.08457354263049 | -4.40650155619285 | -0.52908052129614  |
| H | 9.18553323115645 | -4.02106519841738 | -2.76587495734101  |
| I | 4.40413443826524 | -1.72801360431535 | -12.53612656823601 |

## Biphenyl

|   |                   |                    |                  |
|---|-------------------|--------------------|------------------|
| C | 11.45985196853259 | -9.39049674046563  | 3.41372949266598 |
| C | 10.29579750585618 | -9.74290124461156  | 4.11553090905987 |
| C | 12.55169475083343 | -8.77426191608192  | 4.07378769277053 |
| H | 9.46381943681825  | -10.22842091484977 | 3.58121870846780 |
| C | 10.19406867877880 | -9.48755574435306  | 5.49478723154583 |
| C | 12.43383660686097 | -8.52560202510742  | 5.46352586503687 |
| H | 9.28086353149940  | -9.76414786244334  | 6.04449129782857 |
| H | 13.25790000529076 | -8.02786221416373  | 5.99779990138615 |
| C | 11.26916532565209 | -8.87676085027428  | 6.16517677656304 |
| H | 11.19816336552186 | -8.66196763071449  | 7.24310401526753 |
| H | 11.53318775660332 | -9.62028245788049  | 2.33937397530356 |
| C | 13.78526212868275 | -8.39592761932519  | 3.32830422490202 |
| C | 15.06058764239857 | -8.47088103604683  | 3.94070942703243 |
| C | 13.71748678885938 | -7.94726222482258  | 1.98592332784422 |
| C | 16.22213227196756 | -8.11000742845230  | 3.23890279305585 |
| C | 14.87887032031031 | -7.58556569511460  | 1.28447206158101 |
| C | 16.13732713910982 | -7.66462358253248  | 1.90758895343305 |
| H | 15.14701414579060 | -8.84025101242229  | 4.97414645434086 |
| H | 12.73745263003925 | -7.85692459655882  | 1.49212039320109 |
| H | 17.20270872775046 | -8.18535050437678  | 3.73486748804441 |
| H | 14.79826430842683 | -7.22962503219012  | 0.24571798260489 |
| H | 17.04792762841680 | -7.37933221521231  | 1.35856223906445 |

## [TriphosNil]

|    |                   |                   |                   |
|----|-------------------|-------------------|-------------------|
| Ni | 9.29728992705462  | 0.90189590225093  | 0.87346462297441  |
| P  | 11.39802072198985 | 1.42659554645966  | 0.56623940215150  |
| P  | 9.55890296290085  | -0.18961335707514 | 2.73084858861738  |
| P  | 8.53898867101910  | 2.89021600239832  | 1.34678183894842  |
| C  | 12.65243119299725 | 0.18988682702694  | 0.01403614002826  |
| C  | 9.84383499665598  | 3.49809770333661  | 2.56141631165736  |
| H  | 10.47293524169404 | 4.22859966297072  | 2.01151734356238  |
| H  | 9.32043504891091  | 4.07061645819637  | 3.35606305544720  |
| C  | 8.32522285690962  | 6.71363370047423  | -0.35194541844656 |
| H  | 8.69625804706276  | 7.72902537100476  | -0.14354498207819 |
| C  | 11.93869273934344 | 2.00191096967280  | 2.25961457068990  |
| H  | 12.48993205729385 | 1.16207403578535  | 2.73027733191917  |
| H  | 12.66496985277567 | 2.83175464962980  | 2.13336231373349  |
| C  | 7.38895642849436  | 4.11892741795134  | -0.87241787945301 |
| H  | 7.02380102772643  | 3.10086178112157  | -1.08611904628471 |
| C  | 10.79610687481468 | 2.45052132273184  | 3.22425827978268  |
| C  | 8.20060266182488  | 4.35190092391596  | 0.26166218244003  |
| C  | 14.79725869279085 | -0.96683779817515 | 0.15542168485961  |
| H  | 15.75142618284979 | -1.13363686176230 | 0.67835646887657  |

|   |                   |                   |                   |
|---|-------------------|-------------------|-------------------|
| C | 6.96407052215431  | 2.83065527046883  | 2.32836621481483  |
| C | 12.35995964968164 | -0.52892443488979 | -1.16832675000239 |
| H | 11.40455959074900 | -0.36604603229854 | -1.69419419918141 |
| C | 10.04456264775150 | 1.23352109560312  | 3.86071359177828  |
| H | 9.10194128034784  | 1.59879234964338  | 4.31755527336708  |
| H | 10.66002486178921 | 0.82563709863286  | 4.68881511892080  |
| C | 10.78785295795080 | 3.11698398719287  | -1.59484193224872 |
| H | 9.83383907983046  | 2.56741631020086  | -1.60758147797661 |
| C | 8.66677018721195  | 5.65957343401742  | 0.51491018443973  |
| H | 9.29669444520425  | 5.87691333541444  | 1.39049320055468  |
| C | 12.96422491814759 | 3.53217456536352  | -0.57477366798895 |
| H | 13.73429850392279 | 3.29900718082530  | 0.17790291835434  |
| C | 11.48802458147739 | 3.19257462222854  | 4.39955341541180  |
| H | 11.97142693986531 | 4.12668029408948  | 4.04798537163818  |
| H | 12.26795422231902 | 2.55482177411004  | 4.86369089209876  |
| H | 10.74902791672969 | 3.45995857053931  | 5.18135658425893  |
| C | 13.21274545865167 | 4.53682996759149  | -1.52388467156338 |
| H | 14.16403168867665 | 5.09034286005688  | -1.49533440484429 |
| C | 6.50742536820082  | 3.93833402258811  | 3.07847512764664  |
| H | 7.09323892366107  | 4.87124233019134  | 3.11316962499543  |
| C | 13.28125674143669 | -1.45392840453469 | -1.68317192153208 |
| H | 13.04380954666283 | -2.00490466861746 | -2.60547661634441 |
| C | 4.95533701194908  | 1.59217061348683  | 2.97056507271051  |
| H | 4.35188194057615  | 0.67309136588046  | 2.92126023957567  |
| C | 12.71159350756064 | -3.60574970077227 | 3.20428149437054  |
| H | 13.43467001778999 | -4.43032228601871 | 3.30292182995596  |
| C | 6.17864992000804  | 1.66046239722740  | 2.28024108460700  |
| H | 6.52814392679957  | 0.79369823657914  | 1.69690455880845  |
| C | 11.46343144461756 | -1.76660586559222 | 4.20475641966116  |
| H | 11.20655222720924 | -1.17568806011670 | 5.09806614897718  |
| C | 7.51413573135438  | 6.47507352842277  | -1.47398624434451 |
| H | 7.24759249562740  | 7.30227905311679  | -2.14956726235004 |
| C | 12.11040853174847 | -3.34010047326325 | 1.96239429120157  |
| H | 12.36259573390659 | -3.95040609745072 | 1.08208781744578  |
| C | 13.87922612085806 | -0.03622622886306 | 0.67322466291753  |
| H | 14.13891392950001 | 0.50863833076374  | 1.59287889059860  |
| C | 10.86096486280316 | -1.48967669177233 | 2.95710317556632  |
| C | 11.74406227715135 | 2.81941659297451  | -0.60220566695994 |
| C | 7.04439686982109  | 5.17386061813721  | -1.73138889470975 |
| H | 6.41118822576524  | 4.97726864889576  | -2.61012454000648 |
| C | 14.50236875566683 | -1.67610656381290 | -1.02063992235732 |
| H | 15.22515948553209 | -2.40261570501797 | -1.42262179154045 |
| C | 4.51082635527083  | 2.69433428241814  | 3.71955603863705  |
| H | 3.55294400674875  | 2.64470777019961  | 4.25931639782599  |
| C | 11.04395988869214 | 4.11608155669606  | -2.55026706705314 |
| H | 10.28961677988686 | 4.34195552141774  | -3.31925255722073 |
| C | 12.25408473043717 | 4.82883820468538  | -2.51309686997354 |
| H | 12.45386973849425 | 5.61531244055449  | -3.25734568367050 |
| C | 5.28961349546256  | 3.86659228319930  | 3.77372301481412  |
| H | 4.94176863958883  | 4.73530745165777  | 4.35380671791993  |
| C | 12.38893582382258 | -2.81639914850879 | 4.32390583198228  |
| H | 12.85497931878954 | -3.02392180069399 | 5.29939521734781  |
| C | 7.31105288764473  | -1.84654939496374 | 2.79893239597406  |
| H | 7.529444648903396 | -1.98229187812275 | 1.72692036036923  |
| C | 7.82032175870984  | -0.81219857803328 | 4.94647314559152  |
| H | 8.43185380128238  | -0.15133439540156 | 5.57856932009660  |
| C | 5.93448509343031  | -2.34584655255648 | 4.74387600837202  |

|   |                   |                   |                    |
|---|-------------------|-------------------|--------------------|
| H | 5.08148974708497  | -2.87155306177345 | 5.19953793223552   |
| C | 6.22787253710851  | -2.52566981194471 | 3.38014892181288   |
| H | 5.60616588495805  | -3.19188986742662 | 2.76271670812738   |
| C | 6.73126024963150  | -1.48898519370238 | 5.52310015172833   |
| H | 6.50588335152622  | -1.34346865067721 | 6.59109700417675   |
| C | 8.11852793052973  | -0.98657316008027 | 3.57764528582355   |
| C | 11.19272664628965 | -2.28325862210989 | 1.83856317058159   |
| H | 10.73227897470326 | -2.06109748818105 | 0.86338208921746   |
| I | 1.98995571309689  | -6.59136206078870 | -10.69294593086707 |

## References

- [1] Rigaku/MSK, CrystalClear and CrystalStructure, Rigaku/MSK Inc., The Woodlands, Texas, USA, 2006.
- [2] Farrugia, L. J. *WinGX and ORTEP for Windows: an update. J. Appl. Crystallogr.* **2012**, *45*, 849–854.
- [3] Spek, A. L. Single crystal structure validation with the program *PLATON*. *J. Appl. Crystallogr.* **2003**, *36*, 7–13.
- [4] Spek, A. L. Structure validation in chemical crystallography. *Acta Crystallogr. D Biol. Crystallogr.* **2009**, *65*, 148–155.
- [5] Sheldrick, G. M. A short history of *SHELX*. *Acta Crystallogr. A* **2008**, *64*, 112–122.
- [6] Dolomanov, O. V.; Bourhis, L. J.; Gildea, R. J.; Howard, J. A. K.; Puschmann, H. OLEX2: a complete structure solution refinement and analysis program. *J. Appl. Crystallogr.* **2009**, *42*, 339–341.
- [7] Hübschle, C. B.; Sheldrick, G. M.; Dittrich, B. ShelXle: a Qt graphical user interface for SHELXL. *J. Appl. Crystallogr.* **2011**, *44*, 1281–1284.
